1 **Inoculation with *Pisolithus tinctorius* may ameliorate acid rain impacts on soil**  
2  
3 **microbial communities associated with *Pinus massoniana* seedlings**  
4  
5  
6  
7

8  
9 Running Head:

10  
11 **EM inoculation and acid rain on soil abiotic and biotic conditions.**  
12  
13  
14  
15  
16

17 Mia R. Maltz<sup>\*1,3</sup>, Zhan Chen<sup>\*†2</sup>, Jixin Cao<sup>2</sup>, Keshav Arogyaswamy<sup>1</sup>, Hannah Shulman<sup>1</sup>,

18  
19  
20 Emma L. Aronson<sup>1,3</sup>  
21

22  
23 <sup>1</sup> Department of Microbiology and Plant Pathology, *University of California, Riverside,*  
24  
25 *California, United States of America*  
26

27  
28 <sup>2</sup> Laboratory of Forest Ecology and Environment of State Forestry Administration, *Institute*  
29  
30 *of Forest Ecology, Environment, and Protection, Chinese Academy of Forestry, Beijing,*  
31  
32 *China*  
33  
34

35  
36 <sup>3</sup> Center for Conservation Biology, *University of California, Riverside, California, United*  
37  
38 *States of America*  
39

40  
41  
42 Co-first Authors, denotes equal author contributions  
43

44  
45 †Corresponding Author: Zhan Chen (chenzhan0508@126.com)  
46

47  
48 Please direct email correspondence to: maltz@ucr.edu (MM), in care of Zhan Chen;  
49

50  
51 Telephone: 707-478-3921 (MM); Website: <http://sites.uci.edu/maltz/> (MM)  
52

53 Submitted for publication in *Fungal Ecology* in 2018  
54  
55  
56  
57  
58  
59  
60  
61  
62  
63  
64  
65

1       **Abstract**  
2  
3

4               Human activities accelerate acidification, particularly as acid rain, which may  
5  
6       have lasting impacts on soil abiotic and biotic parameters. However, the effects of  
7  
8       acidification on aboveground vegetation, belowground communities, and carbon  
9  
10       cycling remains unresolved. We examined the effects of long-term acidic treatments  
11  
12       and *Pisolithus* inoculation on plants, soils, and microbial communities in pine  
13  
14       plantations and found that exposure to severely-acidic treatments diminished plant  
15  
16       performance, altered microbial communities, and decreased organic matter, nitrate,  
17  
18       and available phosphorus. Although we did not detect any benefits of *Pisolithus*  
19  
20       inoculation for *Pinus* seedlings impacted by severely-acidic treatments, when these  
21  
22       severe treatments were inoculated with *Pisolithus*, both soil properties and microbial  
23  
24       community composition shifted. We posit that inoculation with *Pisolithus* may  
25  
26       alleviate stressful environmental conditions, and change the structure of mycorrhizal  
27  
28       fungal communities. Although acidification may alter biogeochemical cycles and  
29  
30       constrain aboveground and belowground communities, *Pisolithus* inoculation may  
31  
32       provide benefits to some components of forested ecosystems.  
33  
34  
35  
36  
37  
38  
39  
40  
41  
42  
43  
44  
45  
46  
47  
48

49       **Index descriptors:**  
50

51       Ectomycorrhizal, Inoculation, Acidification, Biogeochemical cycling, Microbial  
52  
53       Communities, Fungal Community Composition, *Pinus massoniana*, *Pisolithus*.  
54  
55  
56  
57  
58  
59  
60  
61  
62  
63  
64  
65

## Introduction

1  
2  
3  
4           Microbes play a critical role in biogeochemical cycling as regulators of  
5  
6 decomposition, plant-microbe interactions, and nutrient transformations (van der  
7  
8 Heijden et al. 2008). However, microbial processes are threatened by human activities  
9  
10 and industrial inputs to ecosystems, such as sulfur (S) and nitrogen (N) deposition,  
11  
12 which result in landscape degradation and biodiversity loss (Bobbink et al. 2010, Allen  
13  
14 et al. 2016). Industrial inputs can acidify soils, further threatening microbial processes  
15  
16 and ecosystem functions. Accelerated acidification in forest soils via acid deposition  
17  
18 from anthropogenic sources may have lasting impacts on soil physicochemical  
19  
20 properties and biotic communities. For example, deposition from industrial emissions  
21  
22 on forests in Europe (Jandl et al. 2012) and North America (Reininger et al. 2011) have  
23  
24 been linked to long-lasting disruptions in biotic communities and biogeochemical  
25  
26 cycling (Likens et al. 1996). However, the long-term effects and the degree to which  
27  
28 industrial inputs leading to soil acidification impacts belowground carbon cycling via  
29  
30 shifts in plant and soil microbial community composition in terrestrial ecosystems is  
31  
32 not yet resolved.  
33  
34  
35  
36  
37  
38  
39  
40  
41  
42  
43  
44  
45

46           While variable, acid rain generally reduces plant productivity by damaging foliar  
47  
48 tissue (Neufeld et al. 1985), reducing biomass (Raschke 1975), diminishing resource  
49  
50 availability to plants (Bååth & Arnebrandt 1994), and disrupting essential physiological  
51  
52 processes including stomatal functioning (Zieger et al. 1983) and chlorophyll  
53  
54 production (Odiyi and Bamidele 2013). Acid deposition dissolves nutrients and  
55  
56  
57  
58  
59  
60  
61  
62  
63  
64  
65

1       divalent cations, such as magnesium (Mg) and calcium (Ca) (Berger et al. 2016, Leys et  
2  
3  
4       al. 2016, Tütscher et al. 2017), while facilitating aluminum (Al) release which could  
5  
6       reduce plant root growth and inhibit plant nutrient uptake (Burnham et al. 2017). By  
7  
8       stripping soils of nutrients, hindering soils' capacity to buffer plants from toxic  
9  
10       substances, and physically harming aboveground vegetation, acid deposition can  
11  
12       reduce plant productivity through malnourishment, dehydration (Macaulay et al. 2015),  
13  
14       or toxicity.

15  
16               By constraining plant productivity, acidification could indirectly alter the  
17  
18       composition of fungal communities and hamper soil microbial processes, with  
19  
20       implications for organic carbon storage in forested ecosystems (Kemmitt et al. 2006,  
21  
22       Janssens et al. 2010, Oulehle et al. 2011). Even though the consequences of these inputs  
23  
24       on soil organic matter (SOM) content have been inconsistent (Averill & Waring 2017,  
25  
26       Liu et al. 2011, Mack et al. 2004), reductions in microbial CO<sub>2</sub> efflux and soil organic  
27  
28       carbon turnover associated with soil acidification could lead to SOM accumulation  
29  
30       (Tonneijic et al. 2010) by inhibiting decomposition of woody debris (Ferreira et al.  
31  
32       2017), and by influencing microbial physiology (Chen et al. 2016), growth (Rousk et al.  
33  
34       2010), and activity (Anderson & Domsch 1993).

35  
36               Through damaging plant communities, acidification in soil could also interfere  
37  
38       with the functioning of plant symbionts, such as mycorrhizal fungi (Carrino-Kyker et  
39  
40       al. 2016). Ectomycorrhizal fungi (EM) play essential roles in forested ecosystems  
41  
42       (McNear Jr. 2013), such as soil exploration and mineral weathering, and by acting as a  
43  
44  
45  
46  
47  
48  
49  
50  
51  
52  
53  
54  
55  
56  
57  
58  
59  
60  
61  
62  
63  
64  
65

1 link between aboveground and belowground components of biogeochemical cycles  
2  
3  
4 (Treseder & Allen 2000). A subset of EM fungi produces extracellular enzymes (Feng  
5  
6 1993, Bodeker et al. 2009), which amplify the bioavailability of rhizosphere nutrients  
7  
8  
9 (Courty et al. 2005, 2010a, Talbot et al. 2015). Because EM fungi obtain a majority of  
10  
11 their C from live plants, mycorrhizal biomass and resource allocation patterns are  
12  
13 largely reliant on the vitality of plant foliage. Previous studies have shown that  
14  
15 acidifying pollutants extensively damage forest tree roots and EM fungi (Sobotka 1964,  
16  
17 Stroo and Alexander 1985), via increased metal toxicity or foliar deterioration. These  
18  
19 effects likely limit photosynthetic capacity, carbohydrate flux to roots, and mycorrhizal  
20  
21 function (Dighton & Jansen 1991). As soil pH plays an important role in regulating EM  
22  
23 turnover (Glassman et al. 2017, Molina & Trappe 1982), acid-induced changes in soil  
24  
25 chemistry can also directly alter EM community structure (Markkola & Ohtonen 1998),  
26  
27 diversity (Kluber et al. 2012), and hyphal length (Dighton & Skeffington 1987).  
28  
29 Although EM fungi aid their host plants in efficiently acquiring nutrients (Nara et al.  
30  
31 2003, Qu et al. 2010, Chorianopoulou et al. 2015), acidic inputs that reduce plant  
32  
33 diversity (Bobbink et al. 2010) or alter plant performance may also indirectly reduce  
34  
35 ectomycorrhizal growth and EM root colonization (Arnolds 1988, Wallenda & Kottke  
36  
37 1998).

38  
39 Along with EM fungal communities and functions, other microbial groups may  
40  
41 also be sensitive to the effects of acidification. The diversity and relative abundances  
42  
43 of some bacterial taxa, such as *Acidobacteria*, *Actinobacteria*, and *Bacterioidetes*,  
44  
45  
46  
47  
48  
49  
50  
51  
52  
53  
54  
55  
56  
57  
58  
59  
60  
61  
62  
63  
64  
65

1 change predictably across soil acidity gradients (Jones et al. 2009). Although a  
2  
3  
4 number of bacterial taxa may be excluded from acidic environments, such as  
5  
6 acid-impacted lakes, several bacterial taxa, including Alphaproteobacteria may thrive  
7  
8  
9 at low pH (Percent et al. 2008). Previous studies have shown that pH is an accurate  
10  
11  
12 predictor of soil bacterial community structure across large spatial scales (Lauber et  
13  
14  
15 al. 2009, Landesman et al. 2014). In their biogeographic survey across the Western  
16  
17  
18 Hemisphere, Fierer and Jackson (2006), found that the most acidic soils in the  
19  
20  
21 Peruvian Amazon had lowest bacterial diversity. In a biogeographic assessment  
22  
23  
24 across Great Britain, Griffiths et al. (2011) similarly showed a positive relationship  
25  
26  
27 between alpha diversity and soil pH; conversely, in the same study, beta diversity was  
28  
29  
30 greatest in acidic soils.

31  
32 Saprotrophic fungal communities may differ as soil and plant-litter chemistries  
33  
34  
35 change (Prewitt et al. 2014). Surveys of macrofungal fruitbodies showed that ratios of  
36  
37  
38 saprotrophic to mycorrhizal fungi tend to increase when forests decline in  
39  
40  
41 productivity (Fellner & Pešková 1995). Factors that reduce forest productivity could  
42  
43  
44 either reduce the relative abundance of mycorrhizal fungi or increase the percentage  
45  
46  
47 of decomposer fungi in the fungal community, with implications for forest nutrient  
48  
49  
50 cycling.

51  
52 As ecosystems recover from long-term effects of acidification, both aboveground  
53  
54  
55 and belowground components of ecosystems may benefit from active mycorrhizal  
56  
57  
58 restoration via EM inoculation to augment revegetation efforts (Leake 2001).  
59  
60  
61  
62  
63  
64  
65

1 Inoculation with EM fungi may improve tree performance and promote ecosystem  
2  
3 recovery from long-term acidification. Some EM, such as *Pisolithus*, grow well in  
4  
5 acidic environments, like acidic strip mine sites (Hendrix et al. 1985, Liang et al.1999,  
6  
7 Baroglio et al. 2000). Mycorrhizal fungi may not only assist host trees in acquiring  
8  
9 macronutrients (Virant-Klan & Gogala 1995, Chuyong et al. 2000), but may also buffer  
10  
11 plants from the effects of acid rain. However, little is known about the levels of soil  
12  
13 acidity which effectively diminish the capacity of EM fungi to associate with or provide  
14  
15 benefits to their plant hosts. Although belowground communities may predictably  
16  
17 respond to acidic inputs, direct restoration of soil microbes and plant-associated fungi  
18  
19 may foster ecosystem succession towards alternative stable states within recently  
20  
21 restored systems (Lewontin 1969, Rustad et al. 1996, Bardhan et al. 2012). An explicit  
22  
23 consideration of both fungal and bacterial communities may provide valuable metrics  
24  
25 for directing conservation efforts and assessing soil ecosystem recovery from  
26  
27 acidification in forested ecosystems (Baldrian et al. 2012).  
28  
29  
30  
31  
32  
33  
34  
35  
36  
37  
38  
39  
40

41 Acid rain inputs and soil acidification are major concerns in Asia (Zhao et al. 2009,  
42  
43 Yang et al. 2012). China is a prime example of acidification because most ecosystems  
44  
45 in southern China receive large quantities of acidic inputs (Zhang et al. 2012). In  
46  
47 southern China, acid rain has detrimentally affected plant and soil traits (e.g., Fan &  
48  
49 Wang 2000, Wang et al. 2009, Zhang et al. 2007, Lv et al. 2014). Yet, little is known  
50  
51 about the long-term impacts of acid rain on soil microbial communities and  
52  
53  
54  
55  
56  
57  
58  
59  
60  
61  
62  
63  
64  
65

1 biogeochemical cycling in forested ecosystems, or whether microbial inoculation  
2  
3 ameliorates these effects on Chinese forests.  
4

5  
6 *Pinus massoniana* is a widespread native pine species in central and southern  
7  
8  
9 China. To compensate for the loss of natural forests in southern China, *P. massoniana*  
10  
11 is commonly grown in pine plantations. This tree forms EM associations with a number  
12  
13 of EM fungal taxa. However, *P. massoniana* is sensitive to acid rain (Yu et al. 2017)  
14  
15 and may benefit from strategies lessening the impact of acidification on pine forests.  
16  
17  
18 Our previous experiments in southern China showed that inoculation with the EM  
19  
20  
21 taxon *Pisolithus tinctorius* may ameliorate the effects of acidification and improve the  
22  
23  
24 growth of *Pinus massoniana* seedlings under different acid rain treatments (Chen et al.  
25  
26  
27 2013, Chen & Shang 2014).  
28  
29  
30

31  
32 To examine the long-term effects of acid rain treatments on plant and soil  
33  
34  
35 properties and microbial communities and to evaluate the extent to which these effects  
36  
37  
38 are ameliorated by ectomycorrhizal inoculation in forested ecosystems in southern  
39  
40  
41 China, we experimentally addressed the following questions: (1) Does acid rain have  
42  
43  
44 inhibitory effects on plant, soil, and microbial communities? And (2), does active  
45  
46  
47 mycorrhizal restoration increase plant growth, improve soil properties, and promote  
48  
49  
50 microbial diversity following protracted acid rain exposure? To approach these  
51  
52  
53 questions, we first investigated the effects of acidic treatments on plant performance in  
54  
55  
56 a forested ecosystem in southern China by evaluating soil properties, nutrient  
57  
58  
59 concentrations, and soil organic matter in both acid-treated and inoculated treatment  
60  
61  
62  
63  
64  
65



1 plots. Next, we examined fungal and bacterial communities to determine whether  
2  
3  
4 *Pisolithus* inoculation ameliorated the effects of acid treatments on soil microbial  
5  
6 communities and plant hosts. We hypothesized that in acidic treated *P. massoniana*  
7  
8 plots (1) plant performance would decline, (2) both soil nutrients and soil organic  
9  
10 matter would decrease, and (3) soil microbial communities would be altered. If  
11  
12 acidification reduces the abundance or functioning of EM fungi, then *P. massoniana*  
13  
14 seedlings may struggle to persist in pine plantations without fungal mutualists.  
15  
16 Therefore, we hypothesized that (4) inoculation with *Pisolithus* would facilitate better  
17  
18 tree growth and resilience than acid-treated trees without *Pisolithus*, along with  
19  
20 associated changes to soil properties, biogeochemical cycling, and microbial  
21  
22 communities in acid-treated *Pisolithus* inoculated plots.  
23  
24  
25  
26  
27  
28  
29  
30  
31

## 32 **Materials and Methods**

### 33 **Study system**

34  
35  
36  
37  
38 We investigated the effects of acidic treatments on plants, soils, and microbial  
39  
40 communities in experimental plots planted with *Pinus massoniana* in Changsha  
41  
42 County, Hunan Province (N28°26'9.13" E113°11'39.26"). The mean annual  
43  
44 temperature is 17.2°C and mean annual precipitation at our study site is 1422.4 mm.  
45  
46  
47  
48 This location is frequently exposed to acidic precipitation, with a mean annual pH of  
49  
50 precipitation of 5.02 (Environmental Quality of Hunan Province in 2016 by  
51  
52 Environmental Protection Department of Hunan, [hnhbt.hunan.gov.cn](http://hnhbt.hunan.gov.cn) ). Prior to  
53  
54  
55  
56  
57  
58  
59  
60  
61  
62  
63  
64  
65

1 treatment, the pH of field soils at our experimental site were  $5.73 \pm 0.13$  (Table 1,  
2  
3 Supplemental Table SI1).  
4  
5

6  
7 Our experimental plots were located within a cleared field which was previously  
8 cultivated, but allowed to lay fallow for four years prior to our study. Prior to initiating  
9  
10 our experimental treatments, in March 2015 we analyzed baseline soil nutrients within  
11  
12 our field plots and found that soils contained total N of  $0.13 \text{ g kg}^{-1}$ , Olsen –  
13  
14 phosphorus (P) of  $28.59 \text{ mg kg}^{-1}$ , and an available potassium (K) of  $31.5 \text{ mg kg}^{-1}$ .  
15  
16  
17  
18

19 Using a total organic carbon (TOC) analyzer, we found that soil organic matter was  
20  
21  
22  
23  
24  
25  
26  
27  
28  
29  
30  
31  
32  
33  
34  
35  
36  
37  
38  
39  
40  
41  
42  
43  
44  
45  
46  
47  
48  
49  
50  
51  
52  
53  
54  
55  
56  
57  
58  
59  
60  
61  
62  
63  
64  
65

Using a total organic carbon (TOC) analyzer, we found that soil organic matter was  
20.28  $\text{g kg}^{-1}$ . We constructed eighteen  $6 \text{ m}^2$  experimental plots; each plot was covered  
with a canopy, which extended 5 m above the plots. This canopy enclosed our  
experimental plots, thus preventing natural precipitation from directly reaching soil  
surfaces. Outside of each treatment plot, we left an untreated 0.5 m – 0.6 m gap  
surrounding each edge of each treatment plot.

#### *Inoculation treatment*

In March 2013, *Pinus massoniana* seedlings were inoculated with either  
*Pisolithus tinctorius* EM fungal inoculum (*Pisolithus tinctorius* [Pers.] Coker et Couch;  
Sclerodermatacea) or sterilized *P. tinctorius* material. *Pisolithus tinctorius* was isolated  
from Jiangxi Province and cultured in vermiculite and peat. We autoclaved *P.*  
*tinctorius* material for one hour at 0.11MPa pressure and  $121^\circ\text{C}$  to eliminate any viable  
*Pisolithus tinctorius* spores or hyphal fragments in the sterilized material.

1 Both inoculated and uninoculated *P. massoniana* seedlings were grown in natural  
2  
3 light under a canopy of transparent film, and watered, as needed, for two years prior to  
4  
5 outplanting. In March 2015, 30 inoculated *P. massoniana* or 30 *P. massoniana*  
6  
7 uninoculated seedlings (with autoclaved inoculum added) were planted in each  
8  
9 experimental plot. Seedlings were maintained in our experimental plots for 20  
10  
11 months.  
12  
13  
14  
15  
16  
17  
18

### 19 *Acidic treatment*

20  
21  
22

23 Beneath the constructed canopy, we treated soils in our experimental plots with  
24  
25 solutions consisting of either a moderately-acidic (pH 4.5) solution or a  
26  
27 severely-acidic (pH 3.5) solution, or an ambient treatment (pH 5.6); ambient  
28  
29 treatments received solutions under the same constructed canopy. Each experimental  
30  
31 treatment plot was replicated three times per treatment combination, totaling 18  
32  
33 experimental plots. To achieve pH treatment solutions, deionized water was treated  
34  
35 with an acidic solution composed of sulfuric acid ( $\text{H}_2\text{SO}_4^{2-}$ ) and nitric acid ( $\text{HNO}_3^-$ ), to  
36  
37 lower the pH of the solution to either pH 4.5 (moderately-acidic) or pH 3.5  
38  
39 (severely-acidic), or for ambient solutions to reach a pH of 5.6. No additional  
40  
41 nutrients were added to our solutions. Each *P. massoniana* seedling, including those in  
42  
43 ambient treatments, received 6.7 L of solution per week, which corresponded to 1.1 L  
44  
45  $\text{m}^{-2}$  per week, for 20 months. Ambient treatments received the same solutions as the  
46  
47 severely and moderately-acidic treatments, except the pH of ambient treatments was  
48  
49  
50  
51  
52  
53  
54  
55  
56  
57  
58  
59  
60  
61  
62  
63  
64  
65

1 5.6, which was more basic than the mean annual pH of precipitation in the region. The  
2  
3 mole ratio of  $\text{SO}_4^{2-}$  to  $\text{NO}_3^-$  in the acidic solutions was 4:1. Other ion concentrations in  
4  
5 the solutions were  $\text{NH}_4^+$  - 2.67 mg L<sup>-1</sup>,  $\text{Ca}^{2+}$  - 3.37 mg L<sup>-1</sup>,  $\text{Mg}^{2+}$  - 0.33 mg L<sup>-1</sup>,  $\text{Cl}^-$  -14  
6  
7 mg L<sup>-1</sup>,  $\text{K}^+$  - 0.79 mg L<sup>-1</sup>,  $\text{Na}^+$  - 0.36 mg L<sup>-1</sup>,  $\text{F}^-$  - 0.39 mg L<sup>-1</sup>. In addition to spraying  
8  
9 treatment solutions on seedlings in experimental plots, plots were consistently  
10  
11 watered with local groundwater, pH 6.2, up to several times weekly, as needed,  
12  
13 throughout the duration of the experiment to make up for the deficit between the  
14  
15 amount of treatment water under the canopy and the ambient rainfall. Amounts  
16  
17 applied to plots varied by ambient seasonal precipitation patterns to eliminate drought  
18  
19 stress, and did not vary by treatment or plot.  
20  
21  
22  
23  
24  
25  
26  
27  
28  
29

### 30 **Sample collection**

31  
32  
33  
34  
35 Plants and soil samples were collected in both November 2015 and November  
36  
37 2016, after 8 and 20 months, respectively. Three randomly selected seedlings were  
38  
39 destructively sampled per experimental plot, and plant height, diameter, and fresh  
40  
41 weight biomass was recorded from each sample. Plant samples were then oven dried  
42  
43 at 60 °C for 48 h, and weighed on an analytical balance to determine the dry weight  
44  
45 biomass. We recorded total plant biomass, aboveground biomass, belowground  
46  
47 biomass, and needle weights from each individual, as well as soil properties (SI Table  
48  
49 2-SI Table 3).  
50  
51  
52  
53  
54  
55  
56  
57  
58  
59  
60  
61  
62  
63  
64  
65

1 Three soil cores (20 cm x 3.4 cm) were randomly collected from within the drip  
2  
3 line (under the canopy) of treated plants within each plot. Each sample was  
4  
5 homogenized and subsequently used to analyze soil properties. Soil subsamples (100 g  
6  
7 per subsample) were immediately frozen on dry ice for transport back to the laboratory,  
8  
9 and stored at -80 °C for molecular analyses of microbial communities. We weighed  
10  
11 0.25 g aliquots of each frozen soil sample in triplicate to assay for microbial  
12  
13 community analyses. Next, we extracted DNA from these soil aliquots and targeted  
14  
15 hypervariable portions of both the V3–V4 region of the bacterial 16S rRNA gene and  
16  
17 the fungal internal transcribed spacer (fungal ITS1) for Polymerase chain reactions  
18  
19 (PCR) amplification. We purified and quantified our PCR products, prior to pooling  
20  
21 in equimolar concentrations for Illumina Miseq sequencing (Illumina Incorporated,  
22  
23 California; SI Molecular Methods).

## 40 **Statistical analysis**

41 To test our hypothesis that plant performance would decline in acidic treated *P.*  
42  
43 *massoniana* plots, we performed a series of analyses of variance (ANOVAs) with  
44  
45 acidic solution treatment as the independent variable and plant height or plant biomass  
46  
47 as the dependent variables. To address our second hypothesis, we examined the  
48  
49 response of soil organic matter and soil nutrients to acidic treatments by performing  
50  
51 response ratios. In each of these cases, the independent variable was acid treatment  
52  
53  
54  
55  
56  
57  
58  
59  
60  
61  
62  
63  
64  
65

1 level, and the dependent variable was soil organic matter or soil nutrients. The ratio of  
2  
3  
4 the values for each treatment combination was  $\log_2$ -transformed to provide a response  
5  
6 factor. To disentangle the direct effects of acid treatments on plants with the indirect  
7  
8 effects of acid treatment on mycorrhizal fungi, we measured the effect of *Pisolithus*  
9  
10 inoculation on *P. massoniana*. Where indicated, Tukey post-hoc tests for pairwise  
11  
12 comparisons were applied.  
13  
14  
15  
16  
17

18 We constructed a linear model to address our third and fourth hypotheses that  
19  
20 acid treatments would alter the microbial community and *Pisolithus* inoculation  
21  
22 promotes plant, soil, and microbial recovery. For examining microbial and fungal  
23  
24 community shifts and to determine the relationship between fungal or microbial  
25  
26 community composition and acidic treatments, we used a PERMANOVA analysis of  
27  
28 microbial community data using Bray–Curtis dissimilarity and the adonis function in  
29  
30 the vegan package of R (Anderson et al. 2008; Oksanen et al. 2012). In this model, we  
31  
32 investigated the relationship between fungal and microbial community composition  
33  
34 and inoculation in both 2015 and 2016. In order to account for plot to plot variation,  
35  
36 we used 'strata' in adonis2 to restrict permutations solely within our spatial variable  
37  
38 (i.e., row proximity to the Jingouba River). We examined how fungal and bacterial  
39  
40 community composition shifted in relation to soil nutrients and physicochemical  
41  
42 properties, including the ratio of divalent cations to total free Al, by including these  
43  
44 environmental variables in our PERMANOVA analyses.  
45  
46  
47  
48  
49  
50  
51  
52  
53  
54  
55  
56  
57  
58  
59  
60  
61  
62  
63  
64  
65

1 Principal coordinate analyses (PCoA) plots with Bray-Curtis dissimilarity metrics  
2  
3 were used to visualize fungal and bacterial community composition, and to determine  
4  
5 whether inoculation was related to microbial community composition or response to  
6  
7 acidic treatments. We bioinformatically examined differences in fungal functional  
8  
9 groups, trophic levels, and guilds through the use of the FUNguild database (Nguyen  
10  
11 et al. 2016) and conducted a series of general linear models to examine shifts in  
12  
13 fungal functional groups among our treatment groups. Significant shifts in microbial  
14  
15 community composition, increases in soil organic matter, or increased similarity to  
16  
17 ambient treatments along with inoculation would suggest that microbial community  
18  
19 responses may be related to recovery from the long-term effects of acidification.  
20  
21  
22  
23  
24  
25  
26  
27  
28

## 30 **Results**

### 31 *Plant performance*

32  
33  
34  
35  
36  
37 After two years of treatments, shoot heights and biomass of severely-acid treated  
38  
39 plants were lower than untreated plants ( $p < 0.05$ ) (Table 2). Specifically, we observed  
40  
41 that both dried stem biomass and dried needle biomass were significantly lower in  
42  
43 plants from severely-acidic treated plots ( $p < 0.05$ ). Moderately-acidic treatments had no  
44  
45 effect on plant growth ( $p > 0.05$ ). Uninoculated severely-acid treated plants were  
46  
47 shorter, had lower stem and needle biomass, and had significantly narrower diameter  
48  
49 than uninoculated ambient seedlings ( $p < 0.05$ ). Inoculation with *Pisolithus* increased  
50  
51 plant diameter and dried stem biomass ( $p < 0.05$ ), but only in the moderately-acidic  
52  
53  
54  
55  
56  
57  
58  
59  
60  
61  
62  
63  
64  
65 treatments.

### *Soil nutrients*

1  
2  
3  
4  
5  
6  
7  
8  
9  
10  
11  
12  
13  
14  
15  
16  
17  
18  
19  
20  
21  
22  
23  
24  
25  
26  
27  
28  
29  
30  
31  
32  
33  
34  
35  
36  
37  
38  
39  
40  
41  
42  
43  
44  
45  
46  
47  
48  
49  
50  
51  
52  
53  
54  
55  
56  
57  
58  
59  
60  
61  
62  
63  
64  
65

Soil organic matter content in severely-acid treated plots was significantly lower in uninoculated treatments than in all other treatments ( $p < 0.05$ ) (Fig 1). However, when severely-acid treated plots were inoculated with *Pisolithus*, SOM increased to levels equivalent to ambient plots. Although severely-acid treated plots had lower available P, K,  $\text{NH}_4\text{-N}$ , and  $\text{NO}_3\text{-N}$  than ambient plots, the inoculated plots treated with severely-acidic treatments had significantly higher P, K,  $\text{NH}_4\text{-N}$ , and  $\text{NO}_3\text{-N}$  than the uninoculated plots treated with the same severely-acidic solution (SI Table 1, Figs 2-4).

### *Microbial communities*

When controlling for the effect of plot location by restricting our PERMANOVA analyses by proximity to the Jingouba River (our spatial variable) to account for any spatial heterogeneity in our study site, we detected significant main effects of acidic treatment solution and inoculation for fungal communities. We found that variation in fungal communities was determined by acidic treatment solution in both 2015 ( $p = 0.003$ ) and 2016 ( $p < 0.001$ ), and inoculation in 2015 ( $p = 0.009$ ) and 2016 ( $p = 0.008$ ). Also for fungal communities, we detected significant interactions between pH of treatment solution and inoculation in 2015 ( $p = 0.017$ ) and in 2016 ( $p < 0.001$ ). For bacterial communities, we determined that there were significant main effects of acidic treatments in both 2015 ( $p = 0.017$ ) and 2016 ( $p = 0.049$ ) and *Pisolithus* inoculation in 2015 ( $p = 0.009$ ) and 2016 ( $p = 0.031$ ), as well as significant interactions among acidic treatment and inoculation in 2015 ( $p < 0.001$ ) and 2016 ( $p < 0.001$ ).



1                   After two years, fungal and microbial communities differed by acidic  
2  
3  
4                   treatments (Fig 5 and 6), with distinct fungal communities from each treatment  
5  
6  
7                   combination. Differences in fungal communities were more pronounced in 2016,  
8  
9  
10                  which represented the longest duration of time, than they were in 2015. The PCoA  
11  
12                  Axis 2 in both 2015 and 2016 represented ~ 17% of the variation in fungal  
13  
14  
15                  communities. PCoA Axis 1 in 2015 represented 51.5% and Axis 1 in 2016  
16  
17  
18                  represented 22.6 % of the variation in fungal communities (Fig 4). No sequences from  
19  
20  
21                  *Pisolithus* were detected in any of the treatments with autoclaved *Pisolithus* added.  
22  
23  
24                  Fungal communities in *Pisolithus* inoculated treatments were significantly different  
25  
26  
27                  than treatment groups with autoclaved *Pisolithus* added ( $p < 0.001$ ).  
28

29                   When we evaluated the effects of the ratio of divalent cations (Ca + Mg) to the  
30  
31                   total free Al concentrations on fungal community composition, we found that this  
32  
33  
34                   ratio was related to fungal community composition in both 2015 ( $p=0.049$ ) and 2016  
35  
36  
37                   ( $p = 0.001$ ). For bacterial communities, we did not detect any significant effect of the  
38  
39  
40                   ratio of divalent cations to the total free Al concentrations in 2015 ( $p=0.103$ ) or for  
41  
42  
43                   2016 ( $p= 0.1449$ ). However, in 2015 we detected a significant interaction between the  
44  
45  
46                   pH of the treatment solutions and this ratio on bacterial communities ( $p= 0.001$ ).  
47  
48

49                   The PCoA Axis 1 in 2015 represented 37.78% of the variation in bacterial  
50  
51  
52                   communities, while PCoA Axis 1 in 2016 represented 19.59%; Axis 2 in 2015  
53  
54  
55                   represented 17.07 %, and Axis 2 in 2016 represented 10.7% of the variation in  
56  
57  
58                   bacterial communities (Fig 5). The most abundant bacterial order was  
59  
60  
61  
62  
63  
64  
65

1 Xanthomonadales, followed by Sphingobacteriales. In plots treated with severely-acid  
2  
3 solutions, we found a greater relative abundance of Rhodocyclales and Clostridiales  
4  
5 within the bacterial communities, as compared to the abundance of those particular  
6  
7 orders found in plots treated with more moderate and less acidic treatment solutions.  
8  
9

10  
11  
12 Fungal functional groups varied in our treatment plots. There were greater  
13  
14 numbers of fungal pathogens in plots inoculated with *Pisolithus*, then were found in  
15  
16 uninoculated plots ( $p=0.015$ ). Additionally, we detected greater saprotrophic fungal  
17  
18 richness in plots treated with either moderately-acidic solutions ( $p=0.016$ ) or  
19  
20 severely-acidic solutions ( $p=0.030$ ), than in ambient treatments plots. We found that  
21  
22 acidic-solution treatment significantly affected the diversity of mycorrhizal fungal  
23  
24 taxa ( $p<0.001$ ), as did *Pisolithus* inoculation ( $p=0.047$ ). We detected significant  
25  
26 interactions between acidic-solution treatment and inoculation ( $p<0.001$ ). We found  
27  
28 that the ratio of divalent cations (Ca + Mg) to total free Al concentrations affected  
29  
30 mycorrhizal fungal community composition ( $p=0.037$ ), along with significant  
31  
32 interactions between pH and this ratio on mycorrhizal fungal community composition  
33  
34 ( $p=0.006$ ), and a significant interaction among this ratio and *Pisolithus* inoculation on  
35  
36 mycorrhizal communities ( $p=0.049$ ).  
37  
38  
39  
40  
41  
42  
43  
44  
45  
46  
47  
48

49 The ectomycorrhizal taxon *Cenococcum* was found to dominate  
50  
51 severely-acidic treatments inoculated with *Pisolithus*, and was barely detectable in the  
52  
53 moderately-acidic treated or ambient treatments. In fact, *Cenococcum* was ~ 200x  
54  
55 more abundant in severely acidic inoculated treatment plants, than in all other  
56  
57  
58  
59  
60  
61  
62  
63  
64  
65

1 treatments combined. Some EM fungal taxa, such as *Tricholoma* were only found in  
2  
3 severely-acidic treated plots. While other EM taxa, such as *Russula*, *Sebacina*, and  
4  
5  
6 *Scleroderma* were only found in plots treated with moderately-acidic solutions.  
7  
8  
9 Another EM taxon, *Suillus*, was found only in ambient plots, and was not detected in  
10  
11  
12 either moderately or severely-acidic treatments. Fungal taxa *Amphinema* and  
13  
14  
15 *Archaeorhizomyces* dominated ambient treatment plots, while *Trichophaea* and  
16  
17  
18 *Oidiodendron* were more prevalent in plots treated with severely-acidic solutions than  
19  
20  
21 in other treatment groups.  
22  
23  
24  
25

## 26 **Discussion and Conclusions**

27  
28  
29 We examined the effects of long-term acidic treatments and mycorrhizal  
30  
31  
32 inoculation on above- and belowground properties in pine plantations in southern  
33  
34  
35 China. Overall, we found that severely-acidic treatments not only changed nutrient  
36  
37  
38 availability and organic matter content in soils, but also altered bacterial and fungal  
39  
40  
41 communities. Plant growth was inhibited and microbial community composition  
42  
43  
44 shifted, suggesting that long-term exposure to acidic treatments may affect both  
45  
46  
47 above- and belowground components of ecosystems. However, soils from plots  
48  
49  
50 inoculated with *Pisolithus* and exposed to severely-acidic treatments had very  
51  
52  
53 different fungal communities than those exposed to acid with autoclaved *Pisolithus*  
54  
55  
56 added. In the context of restoration, the results from these crossed treatments show  
57  
58  
59 that *Pisolithus* inoculation may alter fungal communities. In particular, inoculation  
60  
61  
62  
63  
64  
65

1 may have elicited shifts towards fungal communities found in less disturbed soils or  
2  
3 sites less impacted by acidic deposition, which may contain fungi that contribute  
4  
5 towards stabilizing soil organic matter. Ostensibly, *Pisolithus* tolerates environmental  
6  
7 stress and may either alleviate stressful conditions or prime soil microbial processes  
8  
9 (Stroo and Alexander 1984, Silva et al. 2013). Although inoculation may influence  
10  
11 the responses of microbes and some abiotic components of these terrestrial  
12  
13 ecosystems to acid rain, benefits of *Pisolithus* inoculation were not evident for plants  
14  
15 in severely-acidic treatments. Our findings highlight how biogeochemical cycling by  
16  
17 plants and microbes may be constrained by long-term acidic deposition, but that  
18  
19 inoculation with plant-associated mycorrhizal fungi may facilitate changes in the  
20  
21 community structure of this forested ecosystem.  
22  
23  
24  
25  
26  
27  
28  
29  
30

31  
32 As terrestrial ecosystems are chronically exposed to acid rain, plants may  
33  
34 become malnourished or their productivity may be diminished (Abdulaha-Al Baquy *et al.*  
35  
36 *al.* 2017, Likens *et al.* 1996). Indeed, *Pinus massoniana* had lower needle biomass  
37  
38 and plants were shorter in severely-acid treated plots, as compared to untreated  
39  
40 ambient plots. As acidification inhibited plant growth and damaged aboveground  
41  
42 tissues, it may have also hindered gas exchange and limited plant C sequestration  
43  
44 (Kemmitt *et al.* 2006, Janssens *et al.* 2010, Oulehle *et al.* 2011). Although inoculation  
45  
46 increased plant performance in moderately treated plots more than in ambient plots,  
47  
48 inoculation did not significantly promote plant recovery in severely treated plots.  
49  
50  
51  
52  
53  
54  
55  
56  
57  
58  
59  
60  
61  
62  
63  
64  
65

1 While the effects on fungal-plant mutualisms may be context-dependent,  
2  
3 mycorrhizal associations may be expensive for plants to maintain in stressful  
4  
5 environments (Jonsson *et al.* 2001, Hoeksema *et al.* 2010). EM fungi often augment  
6  
7 plant primary production and plants reallocate a portion of this atmospheric C to their  
8  
9 EM partner for use in building hyphae (Treseder and Holden 2013). However,  
10  
11 environmental stress, such as strong acid, may hinder this process and halt both plant  
12  
13 and fungal growth.  
14  
15  
16  
17  
18  
19  
20

21 *Pisolithus* is a generalist melanized ectomyorrhizal fungus, which has been  
22  
23 found to survive in highly acidic environments (Hendrix *et al.* 1985, Silva *et al.* 2013).  
24  
25 As demonstrated by Fernandez *et al.* (2013) using minirhizotron imaging, fungal  
26  
27 hyphae from another melanized EM fungal taxon, *Cenococcum geophilum*, may  
28  
29 persist in the soil longer than non-melanized ectomyorrhizal fungi, as their  
30  
31 melanin-rich hyphae is resistant to decomposition. Given that *Cenococcum* dominated  
32  
33 our severely-acidic *Pisolithus* inoculated plots, and was barely detectable in any other  
34  
35 treatments, the presence and persistence of this taxon may have contributed to our  
36  
37 observed patterns of SOM accumulation, if these mycorrhizal residues contributed to  
38  
39 soil C stocks (Clemmensen *et al.* 2013). Therefore, we posit that the prevalence of  
40  
41 *Cenococcum* may have contributed to the marked increases in SOM found in our  
42  
43 *Pisolithus* inoculated, severely-acidic treated plots.  
44  
45  
46  
47  
48  
49  
50  
51  
52  
53

54  
55 Overall, we found lower SOM, available phosphorus, and nitrate in  
56  
57 severely-acidic treated plots, possibly because the acid rain treatments modified the  
58  
59  
60  
61  
62  
63  
64  
65

1 existing biogeochemical cycles. Acidic compound treatments may have stimulated  
2  
3  
4 microbes to use older and more recalcitrant carbon from soil organic carbon pools, as  
5  
6 was found by Waldrop & Firestone (2004), which could contribute to these relatively  
7  
8 low observations of SOM in severely-acidic, but uninoculated, treated plots. While  
9  
10 the average acid status of the severely-acidic treated plots did not decrease at the end  
11  
12 of the study period, the acidic water solution acidic inputs may have quickly and  
13  
14 repeatedly dissolved nutrients from the soil, as was observed by Andersson *et al.*  
15  
16 (2015). Because of its essential role in biomolecules and as a micronutrient,  
17  
18 phosphorus is ubiquitous in soil biomass and critical to all living organisms. Fungal  
19  
20 diversity has been correlated with higher plant-available phosphorus concentrations  
21  
22 (Erlandson *et al.* 2016). However, since pH is a strong predictor of changes to fungal  
23  
24 community composition, acidic stress could alter the fates of P during  
25  
26 microbially-mediated organic matter turnover. Chemical weathering releases  
27  
28 orthophosphate into soil solutions, yet, its bioavailability is optimized at neutral pH  
29  
30 (pH ~ 6.5) when Al and Ca phosphates are both minimized (Sylvia *et al.* 2005).  
31  
32 Carrino-Kyker *et al.* (2016) found that elevating pH also increased soil P availability,  
33  
34 while Barrow (1984) demonstrated P losses and reduced bioavailability at acidic pH  
35  
36 levels.  
37  
38  
39  
40  
41  
42  
43  
44  
45  
46  
47  
48  
49  
50

51  
52 The impact of acidic conditions on soil microbiota may have caused the  
53  
54 variations we observed in nitrate availability. Although nitrate is mobile and readily  
55  
56 assimilated by plants and microbes, acidic conditions may constrain the growth and  
57  
58  
59  
60  
61  
62  
63  
64  
65

1 activity of nitrifying bacteria (Sylvia et al. 2005). In our study, as the pH treatments  
2  
3 approached neutral, we observed greater nitrate, available P, and SOM, than in  
4  
5 severely-acidic treatment plots with autoclaved *Pisolithus* added. In contrast, we  
6  
7 found no response of ammonia to acidification. Given the important role of  
8  
9 mycorrhizal fungi in nitrogen cycling and supporting plant N acquisition, factors that  
10  
11 constrain N cycling bacteria and fungi could influence the productivity of terrestrial  
12  
13 ecosystems. Moreover, mycorrhizal fungi are sensitive to N availability; in an N  
14  
15 deposition gradient in Alaska, Lilleskov et al. (2002) suggest that long-term N  
16  
17 deposition dramatically changes ectomycorrhizal community structure and lead to  
18  
19 reductions in ectomycorrhizal species richness. When *Pisolithus* inoculation  
20  
21 treatments were applied to these plots treated with severely-acidic solutions, we  
22  
23 observed an increase in available P, nitrate, and SOM, which suggests that *Pisolithus*  
24  
25 may be assisting in biogeochemical cycling. Thus, adding a mycorrhizal fungus like  
26  
27 *Pisolithus* may buffer soil conditions to promote nutrient retention, foster conditions  
28  
29 conducive to co-existing taxa, or assist in the recovery of soil physicochemical  
30  
31 properties in acidic conditions.  
32  
33  
34  
35  
36  
37  
38  
39  
40  
41  
42  
43  
44  
45  
46  
47

#### 48 *Soil microbial communities:*

49  
50  
51 We found that the direct manipulations of simulated rain acidity extended  
52  
53 beyond the plant community to affect soil microbes. *Pisolithus* inoculation  
54  
55 significantly altered fungal and bacterial community composition. Further, the  
56  
57  
58  
59  
60  
61  
62  
63  
64  
65

1 interactive effect of acidic treatment and inoculation status altered belowground  
2  
3 fungal communities in a way that differed from the separate impact of each treatment.  
4

5  
6 Clemmenson (2015) showed that mycorrhizal functional types may strongly,  
7  
8 and differentially, influence N immobilization and C sequestration in forested  
9  
10 ecosystems. Therefore, the functional response of fungal communities to mycorrhizal  
11  
12 inoculation may feedback to alter nutrient cycling or microbial interactions in  
13  
14 ecosystems exposed to chronic acidic deposition. These findings highlight the  
15  
16 potential of *Pisolithus* inoculum to buffer soil conditions for other fungi in ecosystems  
17  
18 exposed to long-term acidic deposits.  
19  
20  
21  
22  
23  
24

25  
26 Our study provides evidence that both acidic treatments and *Pisolithus*  
27  
28 inoculation affect aboveground and belowground components of ecosystems, as well  
29  
30 as soil physicochemical properties, yet it has some limitations. For instance, our study  
31  
32 was conducted within pine plantations in southern China, and thus our interpretations  
33  
34 are limited to *Pinus massoniana* forested ecosystems and plantations in this region.  
35  
36 Additionally, although we applied acidic treatments to soils in our treatment plots  
37  
38 weekly for 20 months, at the end of our study soil pH did not vary predictably across  
39  
40 treatments. In fact, soil pH was as low in the acidic *Pisolithus* inoculated plots as it  
41  
42 was in ambient plots with autoclaved *Pisolithus* added. Therefore, protracted  
43  
44 additions of different levels of acidic solutions may have influenced the plant and  
45  
46 microbial cycling of nutrients and water differently, which may have altered soil pH  
47  
48 differently in our inoculated treatment plots, potentially because of stress-response  
49  
50  
51  
52  
53  
54  
55  
56  
57  
58  
59  
60  
61  
62  
63  
64  
65



1 traits associated with *Pisolithus*. Indeed, other studies have shown this fungus to be  
2  
3  
4 resilient and facilitate the recovery of plants grown in acidic coal spoils (Marx and  
5  
6 Artman 1979).  
7

8  
9 It is worth noting that there was some inter-annual and plot-to-plot variation in  
10  
11 soil pH, which in 2016, was significantly correlated with distance from the river. This  
12  
13 may in turn have contributed to some of the effects and patterns observed in soil  
14  
15 physicochemical properties or microbial communities throughout the study. However,  
16  
17  
18 we included distance from river as a factor in our statistical analyses, and did not  
19  
20  
21 detect effects of distance from river on initial soil pH or in 2015, and we have  
22  
23  
24 statistically proven differences driven by acidic-solution treatment and inoculation  
25  
26  
27 with *Pisolithus*.  
28  
29  
30

31  
32 Additionally, we attempted to prevent drought stress by applying additional  
33  
34 water throughout the study. However, as the water used in between treatments had a  
35  
36 normal pH for groundwater in the region (6.2), this may have contributed to the fact  
37  
38 that the soil throughout the study did not show consistent acidifying effects of  
39  
40  
41 treatment, despite clear plant and microbial responses to the severely acidic treatment.  
42  
43  
44 Yet, weekly application of acidic solution treatments was applied for almost two  
45  
46  
47 years, which we found to affect both biotic communities and soil physicochemical  
48  
49  
50 properties. Overall, results from our acidic-solution treatments and inoculation  
51  
52  
53 manipulation suggest that *Pisolithus* inoculation may play a role in the remediation of  
54  
55  
56 forested ecosystems though facilitating changes to the mycorrhizal and microbial  
57  
58  
59  
60  
61  
62  
63  
64  
65

1 community, which could increase inputs into soil organic matter pools in chronically  
2  
3  
4 exposed severely-acidic ecosystems.  
5

6 Our results provide evidence that soil abiotic and biotic components may be  
7  
8  
9 negatively affected by human-practices that increase acidic deposition, acid rain in  
10  
11  
12 particular. We found less SOM in severely-acidic treated plots; SOM, as illustrated by  
13  
14  
15 Magdoff and Weil (2004), may influence soil aggregate stability or improve plant  
16  
17  
18 growth. *Pisolithus* inoculation promoted both soil abiotic and fungal community  
19  
20  
21 recovery in severely-acidic treatment plots. Fungal community assembly in *Pisolithus*  
22  
23  
24 inoculated plots may include taxa which more efficiently use soil resources or are  
25  
26  
27 more effective at nutrient transfer to their plant hosts. However, severely-acidic inputs  
28  
29  
30 may damage aboveground vegetation and inhibit productivity, limiting C allocation to  
31  
32  
33 their associated EM partners. The resultant unequal bi-directional exchange of  
34  
35  
36 resources could feedback to promote fungal hyphal sloughing and the accumulation of  
37  
38  
39 C-rich fungal residues, which may contribute to our observed increases in soil organic  
40  
41  
42 matter in the *Pisolithus* inoculated severely-acidic treatment plots. As acidification  
43  
44  
45 directly reduces plant performance, it may also indirectly inhibit EM fungal  
46  
47  
48 proliferation.

49 Altogether, our findings suggest that chronic exposure to acidic inputs may  
50  
51  
52 change plant and soil properties and fungal and bacterial communities in exposed  
53  
54  
55 forested ecosystems. Moreover, inoculation with *Pisolithus* may assist in the recovery  
56  
57  
58 of some components of belowground ecosystems. These data have implications for  
59  
60  
61  
62  
63  
64  
65

1 management of acid rain-exposed forested ecosystems. For instance, restoration  
2  
3 methods that aim to restore soil microbial communities, such as *Pisolithus*  
4  
5 inoculation, may be especially effective at improving the soil nutrients and soil  
6  
7 organic content at such acidified sites. This study underscores the importance of both  
8  
9 reducing acidification in rain systems and maintaining soil microbial communities  
10  
11  
12 when restoring chronically exposed ecosystems.  
13  
14  
15

### 16 **Acknowledgements**

17  
18 This research was supported by the Public Welfare Project of the National Scientific  
19  
20 Research Institution (CAFRIFEEP201402) in China. We thank D. Jackson, G. Logan,  
21  
22 B. Pickett, S. Saroa, M. Phillips, and A. Swanson for intellectual feedback and  
23  
24 insightful comments on previous drafts. Moreover, we thank the Center for  
25  
26 Conservation Biology and M.F. Allen and E.B. Allen for hosting ZC and MM. We are  
27  
28 grateful for mycorrhizal fungal inoculum and inoculation support from the Study  
29  
30 Center of Tree Mycorrhizae, from the Chinese Academy of Forestry. ZC was supported  
31  
32 by the Public Welfare Project of the National Scientific Research Institution  
33  
34 (CAFYBB2017SY026). EA, MM and KA were supported by the United States National  
35  
36 Science Foundation (NSF ICER-1541047), EA was further supported by the National  
37  
38 Science Foundation (NSF BIO-EF-1550920), and MM was supported by funding from  
39  
40 the Mycological Society of America's Translational Mycology Postdoctoral Award.  
41  
42  
43  
44  
45  
46  
47  
48  
49  
50  
51  
52  
53  
54  
55  
56  
57  
58  
59  
60  
61  
62  
63  
64  
65

## References

- 1  
2  
3 Abdulaha-Al Baquy, M., J.Y. Li, C.Y. Xu, K. Mehmood and R.K. Xu. 2017.  
4 Determination of critical pH and Al concentration of acidic Ultisols for wheat and  
5 canola crops. *Solid Earth* 8: 149-159. doi:10.5194/se-8-149-2017.  
6  
7  
8 Allen, E.B., L.M. Egerton-Warburton, B.E. Hilbig and J.M. Valliere. 2016. Interactions  
9 of arbuscular mycorrhizal fungi, critical loads of nitrogen deposition, and shifts  
10 from native to invasive species in a southern California shrubland. *Botany* 94:  
11 425-433. doi:10.1139/cjb-2015-0266.  
12  
13 Anderson, M. J., Gorley, R. N., & Clarke, R. K. (2008). *Permanova+ for Primer:*  
14 *Guide to Software and Statistical Methods.*  
15  
16 Anderson, T.H. and K.H. Domsch. 1993. The metabolic quotient for CO<sub>2</sub> (QCO<sub>2</sub>) as a  
17 specific activity parameter to assess the effects of environmental-conditions, such  
18 as pH, on the microbial biomass of forest soils. *Soil Biol Biochem* 25: 393-395.  
19 doi:Doi 10.1016/0038-0717(93)90140-7.  
20  
21 Andersson, K.O., M.K. Tighe, C.N. Guppy, P.J. Milham and T.I. McLaren. 2015.  
22 Incremental acidification reveals phosphorus release dynamics in alkaline vertic  
23 soils. *Geoderma* 259: 35-44. doi:10.1016/j.geoderma.2015.05.001.  
24  
25 Averill, C. and B. Waring. 2017. Nitrogen limitation of decomposition and decay: how  
26 can it occur? *Global Change Biology*.  
27  
28 Arnolds, E. 1988. The changing macromycete flora in the Netherlands. *T Brit Mycol*  
29 *Soc* 90: 391-406.  
30  
31 Bååth E. and K. Arnebrandt. 1994. Growth-rate and response of bacterial communities  
32 to pH in limed and ash treated forest soils. *Soil Biology and Biochemistry* 26:  
33 995-1001.  
34  
35 Baldrian, P., M. Kolařík, M. Štursová, J. Kopecký, V. Valášková, T. Větrovský, et al.  
36 2012. Active and total microbial communities in forest soil are largely different  
37 and highly stratified during decomposition. *The ISME journal* 6: 248.  
38  
39 Bardhan, S., S. Jose and M.A. Jenkins. 2012. Microbial community diversity and  
40 composition across a gradient of soil acidity in spruce–fir forests of the southern  
41 Appalachian Mountains. *Appl Soil Ecol* 61: 60-68.  
42  
43 Baroglio C., F. Bosco and V. Specchia. 1999. Biomass production of the mycorrhizal  
44 fungus *Suillus grevillei*: effect of pH and ammonium. *Microbios* 103: 163-177.  
45  
46 Barrow, N.J. 1984. Modeling the effects of pH on phosphate sorption by soils. *J Soil*  
47 *Sci* 35: 283-297.  
48  
49 Berger, T.W., S. Turtcher, P. Berger and L. Lindebner. 2016. A slight recovery of soils  
50 from Acid Rain over the last three decades is not reflected in the macro nutrition of  
51  
52  
53  
54  
55  
56  
57  
58  
59  
60  
61  
62  
63  
64  
65

- 1 beech (*Fagus sylvatica*) at 97 forest stands of the Vienna Woods. *Environ Pollut*  
2 216: 624-635. doi:10.1016/j.envpol.2016.06.024.
- 3 Bobbink, R., K. Hicks, J. Galloway, T. Spranger, R. Alkemade, M. Ashmore, et al.  
4 2010. Global assessment of nitrogen deposition effects on terrestrial plant  
5 diversity: a synthesis. *Ecol Appl* 20: 30-59. doi: 10.1890/08-1140.1.
- 6 Bodeker, I.T.M., C.M.R. Nygren, A.F.S. Taylor, A. Olson and B.D. Lindahl. 2009.  
7 Class II peroxidase-encoding genes are present in a phylogenetically wide range of  
8 ectomycorrhizal fungi. *Isme J* 3: 1387-1395. doi:10.1038/ismej.2009.77.
- 9 Burnham M B, Cumming J R, Adams M B, et al. Soluble soil aluminum alters the  
10 relative uptake of mineral nitrogen forms by six mature temperate broadleaf tree  
11 species: possible implications for watershed nitrate retention. *Oecologia*, 2017,  
12 185(3):1-11.
- 13 Carrino-Kyker, S.R., L.A. Kluber, S.M. Petersen, K.P. Coyle, C.R. Hewins, J.L.  
14 DeForest, et al. 2016. Mycorrhizal fungal communities respond to experimental  
15 elevation of soil pH and P availability in temperate hardwood forests. *Fems*  
16 *Microbiol Ecol* 92. doi:ARTN fiw02410.1093/femsec/fiw024.
- 17 Chen, D.M., J.J. Li, Z.C. Lan, S.J. Hu and Y.F. Bai. 2016. Soil acidification exerts a  
18 greater control on soil respiration than soil nitrogen availability in grasslands  
19 subjected to long-term nitrogen enrichment. *Funct Ecol* 30: 658-669.  
20 doi:10.1111/1365-2435.12525.
- 21 Chen, Z. and H. Shang. 2014. Effects of ectomycorrhizal fungi on nutrient elements of  
22 *Pinus massoniana* seedlings under simulated acid rain. *Scientia Silvae Sinicae* 50:  
23 156-163.
- 24 Chen, Z., L. Wang and H. Shang. 2013. Effects of ectomycorrhizal fungi (*Pisolithus*  
25 *tinctorius* (Pers., Coker & Couch) on the biomass of masson pine (*Pinus*  
26 *massoniana*) seedlings under simulated acid rain. *Acta Ecologica Sinica* 33:  
27 6526-6533.
- 28 Chorianopoulou, S.N., Y.I. Saridis, M. Dimou, P. Katinakis and D.L. Bouranis. 2015.  
29 Arbuscular mycorrhizal symbiosis alters the expression patterns of three key iron  
30 homeostasis genes, ZmNAS1, ZmNAS3, and ZmYS1, in S deprived maize plants.  
31 *Frontiers in plant science* 6.
- 32 Chuyong, G., D. Newbery and N. Songwe. 2000. Litter nutrients and retranslocation in  
33 a central African rain forest dominated by ectomycorrhizal trees. *New Phytol* 148:  
34 493-510.
- 35 Clemmensen, K.E., A. Bahr, O. Ovaskainen, A. Dahlberg, A. Ekblad, H. Wallander, et  
36 al. 2013. Roots and associated fungi drive long-term carbon sequestration in boreal  
37 forest. *Science* 339: 1615-1618. doi:10.1126/science.1231923.

- 1  
2  
3  
4  
5  
6  
7  
8  
9  
10  
11  
12  
13  
14  
15  
16  
17  
18  
19  
20  
21  
22  
23  
24  
25  
26  
27  
28  
29  
30  
31  
32  
33  
34  
35  
36  
37  
38  
39  
40  
41  
42  
43  
44  
45  
46  
47  
48  
49  
50  
51  
52  
53  
54  
55  
56  
57  
58  
59  
60  
61  
62  
63  
64  
65
- Clemmensen, K.E., R.D. Finlay, A. Dahlberg, J. Stenlid, D.A. Wardle and B.D. Lindahl. 2015. Carbon sequestration is related to mycorrhizal fungal community shifts during long-term succession in boreal forests. *New Phytol* 205: 1525-1536. doi:10.1111/nph.13208.
- Courty, P.E., A. Franc and J. Garbaye. 2010a. Temporal and functional pattern of secreted enzyme activities in an ectomycorrhizal community. *Soil Biol Biochem* 42: 2022-2025. doi:10.1016/j.soilbio.2010.07.014.
- Courty, P.E., K. Pritsch, M. Schloter, A. Hartmann and J. Garbaye. 2005. Activity profiling of ectomycorrhiza communities in two forest soils using multiple enzymatic tests. *New Phytol* 167: 309-319. doi:10.1111/j.1469-8137.2005.01401.x.
- Dighton, J. and A.E. Jansen. 1991. Atmospheric pollutants and ectomycorrhizae - More questions than answers. *Environ Pollut* 73: 179-204. doi: 10.1016/0269-7491(91)90049-3.
- Dighton, J. and R.A. Skeffington. 1987. Effects of artificial acid precipitation on the mycorrhizas of scots pine-seedlings. *New Phytol* 107: 191-202. doi:DOI 10.1111/j.1469-8137.1987.tb04893.x.
- Erlanson, S.R., J.A. Savage, J.M. Cavender-Bares and K.G. Peay. 2016. Soil moisture and chemistry influence diversity of ectomycorrhizal fungal communities associating with willow along an hydrologic gradient. *Fems Microbiol Ecol* 92. doi:ARTN fiv14810.1093/femsec/fiv148.
- Fan, H.B. and Y.H. Wang. 2000. Effects of simulated acid rain on germination, foliar damage, chlorophyll contents and seedling growth of five hardwood species growing in China. *Forest Ecol Manag* 126: 321-329.
- Fellner, R. and V. Pešková. 1995. Effects of industrial pollutants on ectomycorrhizal relationships in temperate forests. *Can J Bot* 73: S1310-S1315.
- Feng, Z.W. 1993. Effects of acid rain on ecosystem. China Science and Technology Press.
- Fernandez, C.W., L. McCormack, J.M. Hill, S.G. Pritchard, R.T. Koide. 2013. On the persistence of *Cenocossum geophilum* ectomycorrhizas and its implications for forest carbon and nutrient cycles. *Soil Biology and Biochemistry*. 65: 141-143.
- Ferreira V, Guérold F. Leaf litter decomposition as a bioassessment tool of acidification effects in streams: Evidence from a field study and meta-analysis. *Ecological Indicators*, 2017, 79:382–390.
- Fierer, N. and R.B. Jackson. 2006. The diversity and biogeography of soil bacterial communities. *P Natl Acad Sci USA* 103: 626-631.

- 1  
2  
3  
4  
5  
6  
7  
8  
9  
10  
11  
12  
13  
14  
15  
16  
17  
18  
19  
20  
21  
22  
23  
24  
25  
26  
27  
28  
29  
30  
31  
32  
33  
34  
35  
36  
37  
38  
39  
40  
41  
42  
43  
44  
45  
46  
47  
48  
49  
50  
51  
52  
53  
54  
55  
56  
57  
58  
59  
60  
61  
62  
63  
64  
65
- Glassman, S.I., I.J. Wang and T.D. Bruns. 2017. Environmental filtering by pH and soil nutrients drives community assembly in fungi at fine spatial scales. *Molecular Ecology*: 1-14. doi: 10.1111/mec.14414
- Griffiths, R.I., B.C. Thomson, P. James, T. Bell, M. Bailey and A.S. Whiteley. 2011. The bacterial biogeography of British soils. *Environ Microbiol* 13: 1642-1654. doi:10.1111/j.1462-2920.2011.02480.x.
- Hendrix, JW, CS Hunt and DM Maronek. 1985. Relationship between the ectomycorrhizal fungus *Pisolithus tinctorius* associated with Loblolly Pine and acid-generating *Thiobacillus* spp on an acidic strip mine site. *Canadian Journal of Microbiology* 3: 878-879.
- Hoeksema, J.D., V.B. Chaudhary, C.A. Gehring, N.C. Johnson, J. Karst, R.T. Koide, A. Pringle, C. Zabinski, J.D. Bever, J.C. Moore, G.W.T. Wilson, J.N. Klironomos, J. Umbanhower. 2010. A meta-analysis of context-dependency in plant response to inoculation with mycorrhizal fungi. *Ecology Letters*. 13: 394-407
- Jandl, R., S. Smidt, F. Mutsch, A. Furst, H. Zechmeister, H. Bauer, et al. 2012. Acidification and Nitrogen Eutrophication of Austrian Forest Soils. *Applied & Environmental Soil Science*. 2012.
- Janssens, I., W. Dieleman, S. Luysaert, J.-A. Subke, M. Reichstein, R. Ceulemans, et al. 2010. Reduction of forest soil respiration in response to nitrogen deposition. *Nature geoscience*.-London, 2008, currens 3: 315-322.
- Jonsson, L.M., M.C. Nilsson, D.A. Wardle and O. Zackrisson. 2001. Context dependent effects of ectomycorrhizal species richness on tree seedling productivity. *Oikos* 93: 353-364. doi:DOI 10.1034/j.1600-0706.2001.930301.x.
- Jones, R.T., M.S. Robeson, C.L. Lauber, M. Hamady, R. Knight and N. Fierer. 2009. A comprehensive survey of soil acidobacterial diversity using pyrosequencing and clone library analyses. *ISME J* 3: 442-453. doi:10.1038/ismej.2008.127.
- Kemmitt, S.J., D. Wright, K.W. Goulding and D.L. Jones. 2006. pH regulation of carbon and nitrogen dynamics in two agricultural soils. *Soil Biology and Biochemistry* 38: 898-911.
- Kluber, L.A., S.R. Carrino-Kyker, K.P. Coyle, J.L. DeForest, C.R. Hewins, A.N. Shaw, et al. 2012. Mycorrhizal response to experimental pH and P manipulation in acidic hardwood forests. *Plos One* 7. doi:ARTN e4894610.1371/journal.pone.0048946.
- Landesman, W.J., D.M. Nelson and M.C. Fitzpatrick. 2014. Soil properties and tree species drive beta-diversity of soil bacterial communities. *Soil Biol Biochem* 76: 201-209. doi:10.1016/j.soilbio.2014.05.025.

- 1 Lauber, C.L., M. Hamady, R. Knight and N. Fierer. 2009. Pyrosequencing-based  
2 assessment of soil pH as a predictor of soil bacterial community structure at the  
3 continental scale. *Appl Environ Microb* 75: 5111-5120.  
4 doi:10.1128/Aem.00335-09.  
5  
6  
7 Leake J R. Is diversity of ectomycorrhizal fungi important for ecosystem function?  
8 *New Phytologist*, 2001, 152(1):1–3.  
9  
10 Lewontin, R.C. 1969. Meaning of stability. *Brookhaven Symposium of Biology*. 13.  
11  
12 Leys, B.A., G.E. Likens, C.E. Johnson, J.M. Craine, B. Lacroix and K.K. McLaughlan.  
13 2016. Natural and anthropogenic drivers of calcium depletion in a northern forest  
14 during the last millennium *P Natl Acad Sci USA* 113:6934.  
15 doi:10.1073/pnas.1611402113.  
16  
17  
18 Liang, Y. and Z. Liu. 1999. Effect of aluminum-resistant fungus ALF-1 (*Neurospora*  
19 sp.) from tea rhizospheric soil on pH value of acidic soil. *Journal of Tea Science*  
20 19: 115-118.  
21  
22  
23 Likens, G.E., C.T. Driscoll and D.C. Buso. 1996. Long-term effects of acid rain:  
24 Response and recovery of a forest ecosystem. *Science* 272: 244-246.  
25  
26 Lilleskov, E.A., T.J. Fahey, T.R. Horton, and G.M. Lovett. 2002. *Ecology*. 83: 104-115  
27  
28 Liu, X., L. Duan, J. Mo, E. Du, J. Shen, X. Lu, et al. 2011. Nitrogen deposition and its  
29 ecological impact in China: An overview. *Environ Pollut* 159: 2251-2264.  
30  
31  
32 Lv, Y., C. Wang, Y. Jia, W. Wang, X. Ma, J. Du, et al. 2014. Effects of sulfuric, nitric,  
33 and mixed acid rain on litter decomposition, soil microbial biomass, and enzyme  
34 activities in subtropical forests of China. *Appl Soil Ecol* 79: 1-9.  
35  
36  
37 Macaulay B M, Abigail T O. Effects of simulated acid rain on the morphology,  
38 phenology and yield of Okra (*Abelmoschus esculentus* (L.) Moench). *Journal of*  
39 *Environmental Science Computer Science & Engineering & Technology*, 2015,  
40 4(2):501-508.  
41  
42  
43 Mack, M.C., E.A.G. Schuur, M.S. Bret-Harte, G.R. Shaver and F.S. Chapin. 2004.  
44 Ecosystem carbon storage in arctic tundra reduced by long-term nutrient  
45 fertilization. *Nature* 431: 440-443. doi:10.1038/nature02887.  
46  
47  
48 Magdoff, F and R Weil. 2004. *Soil Organic Matter in Sustainable Agriculture*. CRC  
49 Press, Boca Raton, Florida.  
50  
51  
52 Markkola, A.M. and R. Ohtonen. 1988. The effects of acid deposition on fungi in forest  
53 humus. In: *Ectomycorrhiza and Acid Rain*. Ed: A.E. Jansen, J. Dighton, and  
54 A.H.M. Bresser. 122-126. Bilthoven. The Netherlands: CEC.  
55  
56  
57 Marx, D. H., and J. D. Artman. 1979. *Pisolithus tinctorius* ectomycorrhizae improve  
58 survival and growth of pine seedlings on acid coal spoils in Kentucky and Virginia.  
59 *Reclamation Review* 2:23–31.  
60  
61  
62  
63  
64  
65



- 1  
2  
3  
4  
5  
6  
7  
8  
9  
10  
11  
12  
13  
14  
15  
16  
17  
18  
19  
20  
21  
22  
23  
24  
25  
26  
27  
28  
29  
30  
31  
32  
33  
34  
35  
36  
37  
38  
39  
40  
41  
42  
43  
44  
45  
46  
47  
48  
49  
50  
51  
52  
53  
54  
55  
56  
57  
58  
59  
60  
61  
62  
63  
64  
65
- McNear Jr., D.H. 2013. The rhizosphere-roots, soil and everything in between. *Nature Education Knowledge* 4:1.
- Molina, R. and J.M. Trappe. 1982. Patterns of ectomycorrhizal host specificity and potential among Pacific Northwest conifers and fungi. *Forest Sci* 28: 423-458.
- Nara, K., H. Nakaya, B. Wu, Z. Zhou and T. Hogetsu. 2003. Underground primary succession of ectomycorrhizal fungi in a volcanic desert on Mount Fuji. *New Phytol* 159: 743-756.
- Nguyen, N.H., Z. Song, S.T. Bates, S.M. Branco, L. Tedersoo, J. Menke, J.S. Schilling, P. Kennedy. FUNGuild: An open annotation tool for parsing fungal community datasets by ecological guilds. *Fungal Ecology*. 20: 241-248
- Odiyi, B.O. and J.F. Bamidele 2013 Effect of simulated acid rain on the growth and yield of cassava *Manihot esculenta* (Crantz). *Journal of Agricultural Sciences*. 6: 97-101.
- Oksanen J., Blanchet F.G., Kindt R., Legendre P., Minchin P.R., O'Hara R.B., Simpson G.L., Solymos P., Stevens M.H.H., Wagner H. (2012) *vegan: Community Ecology Package*. R package version 2.0-3.
- Oulehle, F., C.D. Evans, J. Hofmeister, R. Krejci, K. Tahovska, T. Persson, et al. 2011. Major changes in forest carbon and nitrogen cycling caused by declining sulphur deposition. *Global Change Biol* 17: 3115-3129.
- Percent, S.F., M.E. Frischer, P.A. Vescio, E.B. Duffy, V. Milano, M. McLellan, et al. 2008. Bacterial community structure of acid-impacted lakes: What controls diversity? *Appl Environ Microb* 74: 1856-1868. doi:10.1128/Aem.01719-07.
- Prewitt, L., Y. Kang, M.L. Kakumanu and M. Williams. 2014. Fungal and bacterial community succession differs for three wood types during decay in a forest soil. *Microbial Ecol* 68: 212-221.
- Qu, L., K. Makoto, D. Choi, A. Quoreshi and T. Koike. 2010. The role of ectomycorrhiza in boreal forest ecosystem. *Permafrost Ecosystems*. Springer. 413-425.
- Raschke, K. 1975. Stomatal action. *Annual Reviews of Plant Physiology* 26: 309-340
- Reininger, D., P. Fiala and T. Samek. 2011. Acidification of forest soils in the Hrubý Jeseník region. *Soil & Water Research*.
- Rousk, J., E. Baath, P.C. Brookes, C.L. Lauber, C. Lozupone, J.G. Caporaso, et al. 2010. Soil bacterial and fungal communities across a pH gradient in an arable soil. *Isme J* 4: 1340-1351. doi:10.1038/ismej.2010.58.
- Rustad, L.E., I.J. Fernandez, M.B. David, M.J. Mitchell, K.J. Nadelhoffer and R.B. Fuller. 1996. Experimental soil acidification and recovery at the Bear Brook Watershed in Maine. *Soil Science Society of America Journal* 60: 1933-1943.

- 1  
2  
3  
4  
5  
6  
7  
8  
9  
10  
11  
12  
13  
14  
15  
16  
17  
18  
19  
20  
21  
22  
23  
24  
25  
26  
27  
28  
29  
30  
31  
32  
33  
34  
35  
36  
37  
38  
39  
40  
41  
42  
43  
44  
45  
46  
47  
48  
49  
50  
51  
52  
53  
54  
55  
56  
57  
58  
59  
60  
61  
62  
63  
64  
65
- Silva, R.F. M. Lupatini, L. Trindade, Z.I. Antonioli, R.B. Steffen and R. Andreazza. 2013. Copper resistance of different ectomycorrhizal fungi such as *Pisolithus microcarpus*, *Pisolithus* sp., *Scleroderma* sp., and *Suillus* sp. *Brazilian Journal of Microbiology*. 44: 619-627.
- Sobotka, A. 1964. Effects of industrial exhalations on soil biologies of Norway spruce stands in the Ore mountains. *Lesnicky Casopsis* 37: 987-1002.
- Stroo, H.F. and M. Alexander. 1985. Effect of simulated acid-rain on mycorrhizal infection of *Pinus-Strobus* L. *Water Air Soil Poll* 25: 107-114. doi: 10.1007/Bf00159629.
- Sylvia, D.M., P.G. Hartel, J.J. Fuhrmann and D.A. Zuberer. 2005. *Principles and Applications of Soil Microbiology*. Second ed. Pearson, Upper Saddle River, New Jersey.
- Talbot, J.M., F. Martin, A. Kohler, B. Henrissat and K.G. Peay. 2015. Functional guild classification predicts the enzymatic role of fungi in litter and soil biogeochemistry. *Soil Biol Biochem* 88: 441-456. doi:10.1016/j.soilbio.2015.05.006.
- Tonneijck F H, Jansen B, Kgj N, et al. Towards understanding of carbon stocks and stabilization in volcanic ash soils in natural Andean ecosystems of northern Ecuador. *European Journal of Soil Science*, 2010, 61(3):392–405.
- Treseder, K.K. and M.F. Allen. 2000. Mycorrhizal fungi have a potential role in soil carbon storage under elevated CO<sub>2</sub> and nitrogen deposition. *New Phytol* 147: 189-200. doi:DOI 10.1046/j.1469-8137.2000.00690.x.
- Treseder, K.K. and S.R. Holden. 2013. Fungal carbon sequestration. *Science* 339: 1528-1529.
- Türtscher, S., P. Berger, L. Lindebner and T.W. Berger. 2017. Declining atmospheric deposition of heavy metals over the last three decades is reflected in soil and foliage of 97 beech (*Fagus sylvatica*) stands in the Vienna Woods. *Environ Pollut* 230: 561-573. doi:10.1016/j.envpol.2017.06.080.
- van der Heijden, M.G.A., R.D. Bardgett and N.M. van Straalen. 2008. The unseen majority: soil microbes as drivers of plant diversity and productivity in terrestrial ecosystems. *Ecol Lett* 11: 296-310. doi:10.1111/j.1461-0248.2007.01139.x.
- Virant-Klun, I. and N. Gogala. 1995. Impact of VAM on phosphorus nutrition of maize with low soluble phosphate fertilization. *Journal of Plant Nutrition* 18: 1815-1823.
- Waldrop, M.P. and M.K. Firestone. 2004. Altered utilization patterns of young and old soil C by microorganisms caused by temperature shifts and N additions. *Biogeochemistry* 67: 235-248. doi:Doi 10.1023/B:Biog.0000015321.51462.41.

- 1 Wallenda, T. and I. Kottke. 1998. Nitrogen deposition and ectomycorrhizas. *New*  
2 *Phytol* 139: 169-187. doi: 10.1046/j.1469-8137.1998.00176.x.
- 3 Wang, D.Z., X. Jiang, W. Rao and J.Z. He. 2009. Kinetics of soil cadmium desorption  
4 under simulated acid rain. *Ecological Complexity* 6: 432-437.
- 5 Yang, Y., C. Ji, W. Ma, S. Wang, S. Wang, W. Han, et al. 2012. Significant soil  
6 acidification across northern China's grasslands during 1980s–2000s. *Global*  
7 *Change Biol* 18: 2292-2300.
- 8 Yu H, Chen Z., Shang H., Cao J.X. 2017. Effects of ectomycorrhizal fungi on  
9 seedlings of *Pinus massoniana* under simulated acid rain. *Acta Ecologica Sinica*.  
10 37( 16) 5418- 5427.
- 11 Zieger, E. Biology of stomatal guard cells. *Annual reviews of plant physiology*. 34:  
12 441-475
- 13 Zhang, J.E., Y. Ouyang and D.J. Ling. 2007. Impacts of simulated acid rain on cation  
14 leaching from the Latosol in south China. *Chemosphere* 67: 2131-2137.
- 15 Zhang, X., H. Jiang, J. Jin, X. Xu and Q. Zhang. 2012. Analysis of acid rain patterns in  
16 northeastern China using a decision tree method. *Atmospheric Environment* 46:  
17 590-596.
- 18 Zhao, Y., L. Duan, J. Xing, T. Larssen, C.P. Nielsen and J. Hao. 2009. Soil acidification  
19 in China: is controlling SO<sub>2</sub> emissions enough? American Chemical Society.
- 20  
21  
22  
23  
24  
25  
26  
27  
28  
29  
30  
31  
32  
33  
34  
35  
36  
37  
38  
39  
40  
41  
42  
43  
44  
45  
46  
47  
48  
49  
50  
51  
52  
53  
54  
55  
56  
57  
58  
59  
60  
61  
62  
63  
64  
65

**List of Tables:**

**Table 1.** Acidic solution and soil pH across time and among treatment combinations.

**Table 2.** *Pinus massoniana* properties in response to inoculation and acidic treatments.

1  
2  
3  
4  
5  
6  
7  
8  
9  
10  
11  
12  
13  
14  
15  
16  
17  
18  
19  
20  
21  
22  
23  
24  
25  
26  
27  
28  
29  
30  
31  
32  
33  
34  
35  
36  
37  
38  
39  
40  
41  
42  
43  
44  
45  
46  
47  
48  
49  
50  
51  
52  
53  
54  
55  
56  
57  
58  
59  
60  
61  
62  
63  
64  
65

## List of Figures:

**Figure 1.** Map of the study system with scale bar.

**Figure 2.** Response of soil organic matter to acidic treatments and *Pisolithus* inoculation.

**Figure 3.** Response of nitrate to acidic treatments and *Pisolithus* inoculation.

**Figure 4.** Response of available phosphorus to acidic treatments and *Pisolithus* inoculation.

**Figure 5.** Principal coordinate analyses of fungal communities

**Figure 6.** Principal coordinate analyses of bacterial communities

## Figure legends

**Fig 1. Map of the study system with scale bar.** Location of our experimental plots within the Changsha County, Hunan Province (N28°26'9.13" E113°11'39.26"). Acidic treatment solutions are colored in black for severely acidic treatment, blue for moderately acidic treatment, and green for ambient treatment. Treatment plots inoculated with *Pisolithus tinctorius* have patterned fill, while uninoculated treatments have solid fill. Black outline denotes footprint of covered canopy, yellow borders indicate row from Jingouba River, as a spatial delimiter within the study system. Inset map of China indicates where the experimental plots are located geographically.

**Fig 2. Response of soil organic matter to acidic treatments and *Pisolithus* inoculation.** Response of organic matter content in  $\text{g kg}^{-1}$  of soil to acid and *Pisolithus* inoculation treatments, as compared to the organic matter content of uninoculated ambient plots. Responses  $\log_2$  transformed, thus each unit on the horizontal x-axis represents a two-fold change. Error bars correspond to 95% confidence intervals of the

1 mean. If points and error bars cross the dashed line at 0.0, it indicates that the particular  
2 treatment is statistically equivalent to the ambient. If points and error bars are  
3 completely below 0.0 that indicates that soil organic matter is significantly less than  
4 (left of) the untreated ambient plots; if points and error bars are completely above (to  
5 the right of) 0.0, that would indicate that soil organic matter significantly increased in  
6 that particular treatment, as compared to untreated ambient plots.  
7  
8  
9

10  
11  
12 **Fig 3. Response of nitrate to acidic treatments and *Pisolithus* inoculation.**

13 Response of nitrate in mg/kg of soil to acid and *Pisolithus* inoculation treatments, as  
14 compared to the organic matter content of uninoculated untreated ambient plots.  
15 Responses  $\log_2$  transformed, thus each unit on the horizontal x-axis represents a  
16 two-fold change. Error bars correspond to 95% confidence intervals of the mean. If  
17 points and error bars cross the dashed line at 0.0, it indicates that the particular  
18 treatment is statistically equivalent to the ambient. If points and error bars are  
19 completely below 0.0 that indicates that soil nitrate ( $\text{mg kg}^{-1}$ ) is significantly less than  
20 (left of) the untreated ambient; if points and error bars are completely above (to the  
21 right of) 0.0, that would indicate that soil nitrate significantly increased in that  
22 treatment, as compared to untreated ambient plots.  
23  
24  
25  
26  
27  
28  
29  
30  
31  
32  
33

34 **Fig 4. Response of available phosphorus to acidic treatments and *Pisolithus***  
35 **inoculation.** Response of available phosphorus ( $\text{mg kg}^{-1}$ ) to acid and mycorrhizal  
36 inoculation treatments, as compared to the available phosphorus in uninoculated  
37 ambient plots. Responses  $\log_2$  transformed, thus each unit on the horizontal x-axis  
38 represents a two-fold change. Error bars correspond to 95% confidence intervals of the  
39 mean. If points and error bars cross the dashed line at 0.0, it indicates that the particular  
40 treatment is statistically equivalent to the ambient. If points and error bars are  
41 completely below 0.0 that indicates that available phosphorus is significantly less than  
42 (left of) the untreated ambient; if points and error bars are completely above (to the  
43 right of) 0.0, that would indicate that available phosphorus significantly increased in  
44 that particular treatment, as compared to untreated ambient plots.  
45  
46  
47  
48  
49  
50  
51  
52  
53  
54

55 **Fig 5. Principal coordinate analyses of fungal communities.** Principal coordinate  
56 analysis (PCoA) plot of fungal ITS1 sequencing results from 2015 (a) and 2016 (b),  
57 showing fungal community responses to acid and *Pisolithus* inoculation treatments.  
58  
59  
60  
61  
62  
63  
64  
65

1 Solid shapes indicated inoculation with *Pisolithus*; open shapes indicate uninoculated  
2 treatments.

3  
4  
5 **Fig 6. Principal coordinate analyses of bacterial communities.** Principal coordinate  
6 analysis (PCoA) plot of 16S sequencing results from both 2015 (a) and 2016 (b),  
7 showing bacterial and archaeal community responses to acid and inoculation  
8 treatments. Solid shapes represent inoculation with *Pisolithus tinctorius*; open shapes  
9 indicate uninoculated treatments.  
10  
11  
12  
13  
14  
15  
16  
17  
18  
19  
20  
21  
22  
23  
24  
25  
26  
27  
28  
29  
30  
31  
32  
33  
34  
35  
36  
37  
38  
39  
40  
41  
42  
43  
44  
45  
46  
47  
48  
49  
50  
51  
52  
53  
54  
55  
56  
57  
58  
59  
60  
61  
62  
63  
64  
65

## Supplemental information

**Supplemental Table 1.** Spatial heterogeneity in our experimental site: pH shifts with row from Jingouba River.

**Supplemental Table 2.** Soil nutrients and soil organic matter in both 2015 and 2016 in our plots treated with acidic treatments and inoculated with *Pisolithus*.

**Supplemental Table 3.** Soil physicochemical properties and elemental analyses from soil collected in 2015 from our plots treated with acidic treatments and inoculated with *Pisolithus*.

**Supplemental Table 4.** Bacterial community diversity metrics.

**Supplemental Table 5.** Fungal community diversity metrics.

**Supplemental Figure 1. Non-metric multi-dimensional scaling plot illustrating differences in key fungal taxa by acidic-solution treatment.** Shapes represent a portion of the fungal community from either severely acidic treatment plots (circles) shown surrounded by blue dashed ellipse, moderately acidic treatments (squares) shown by the green dashed ellipse, or ambient treatments (triangles) represented by the orange solid ellipse. Ectomycorrhizal fungal taxa (e.g., *Suillus*) and putative root endophytes (e.g., *Archaeorhizomyces*) associated with particular acidic treatment categories are shown in text in close proximity to that representative ellipse.

**Supplemental Figure 2.** Fungal taxa plotted in bar charts, shown with the relative abundance of fungal taxa by acidic-solution treatment and by *Pisolithus* inoculation; treatments with autoclaved *Pisolithus* added marked as ‘Non-inoculated.’

**Supplemental Figure 3.** Bacterial taxa plotted in bar charts, shown with the relative abundance of fungal taxa by acidic-solution treatment and by *Pisolithus* inoculation; treatments with autoclaved *Pisolithus* added marked as ‘Non-inoculated.’

**Supplemental Methods:** Molecular methods used on our soil microbial analyses.



Figure 1. Map of study location  
[Click here to download high resolution image](#)

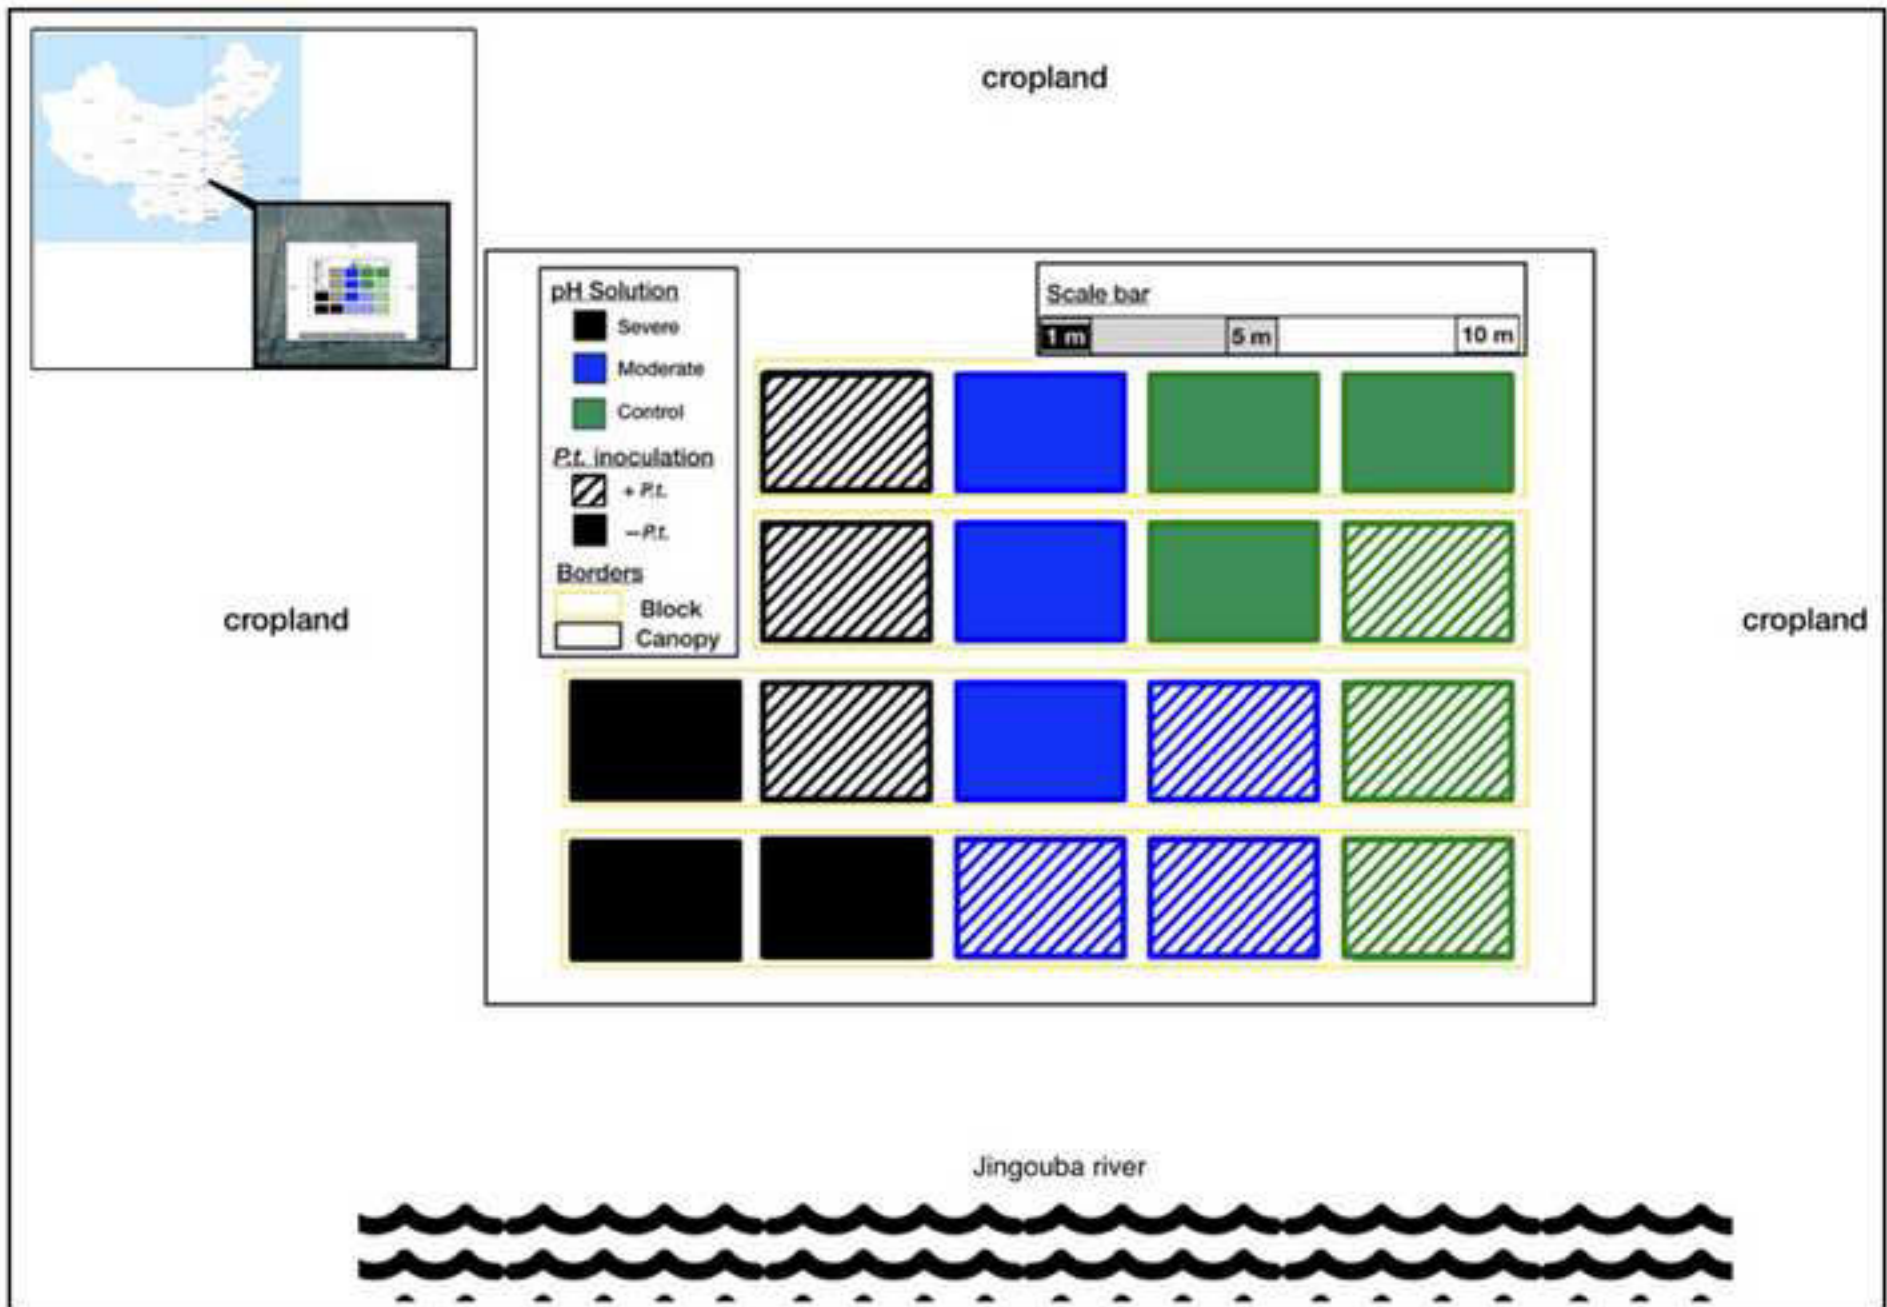

Figure 2. SOM response ratios  
[Click here to download high resolution image](#)

### Soil organic matter ( $\log_2$ -response)

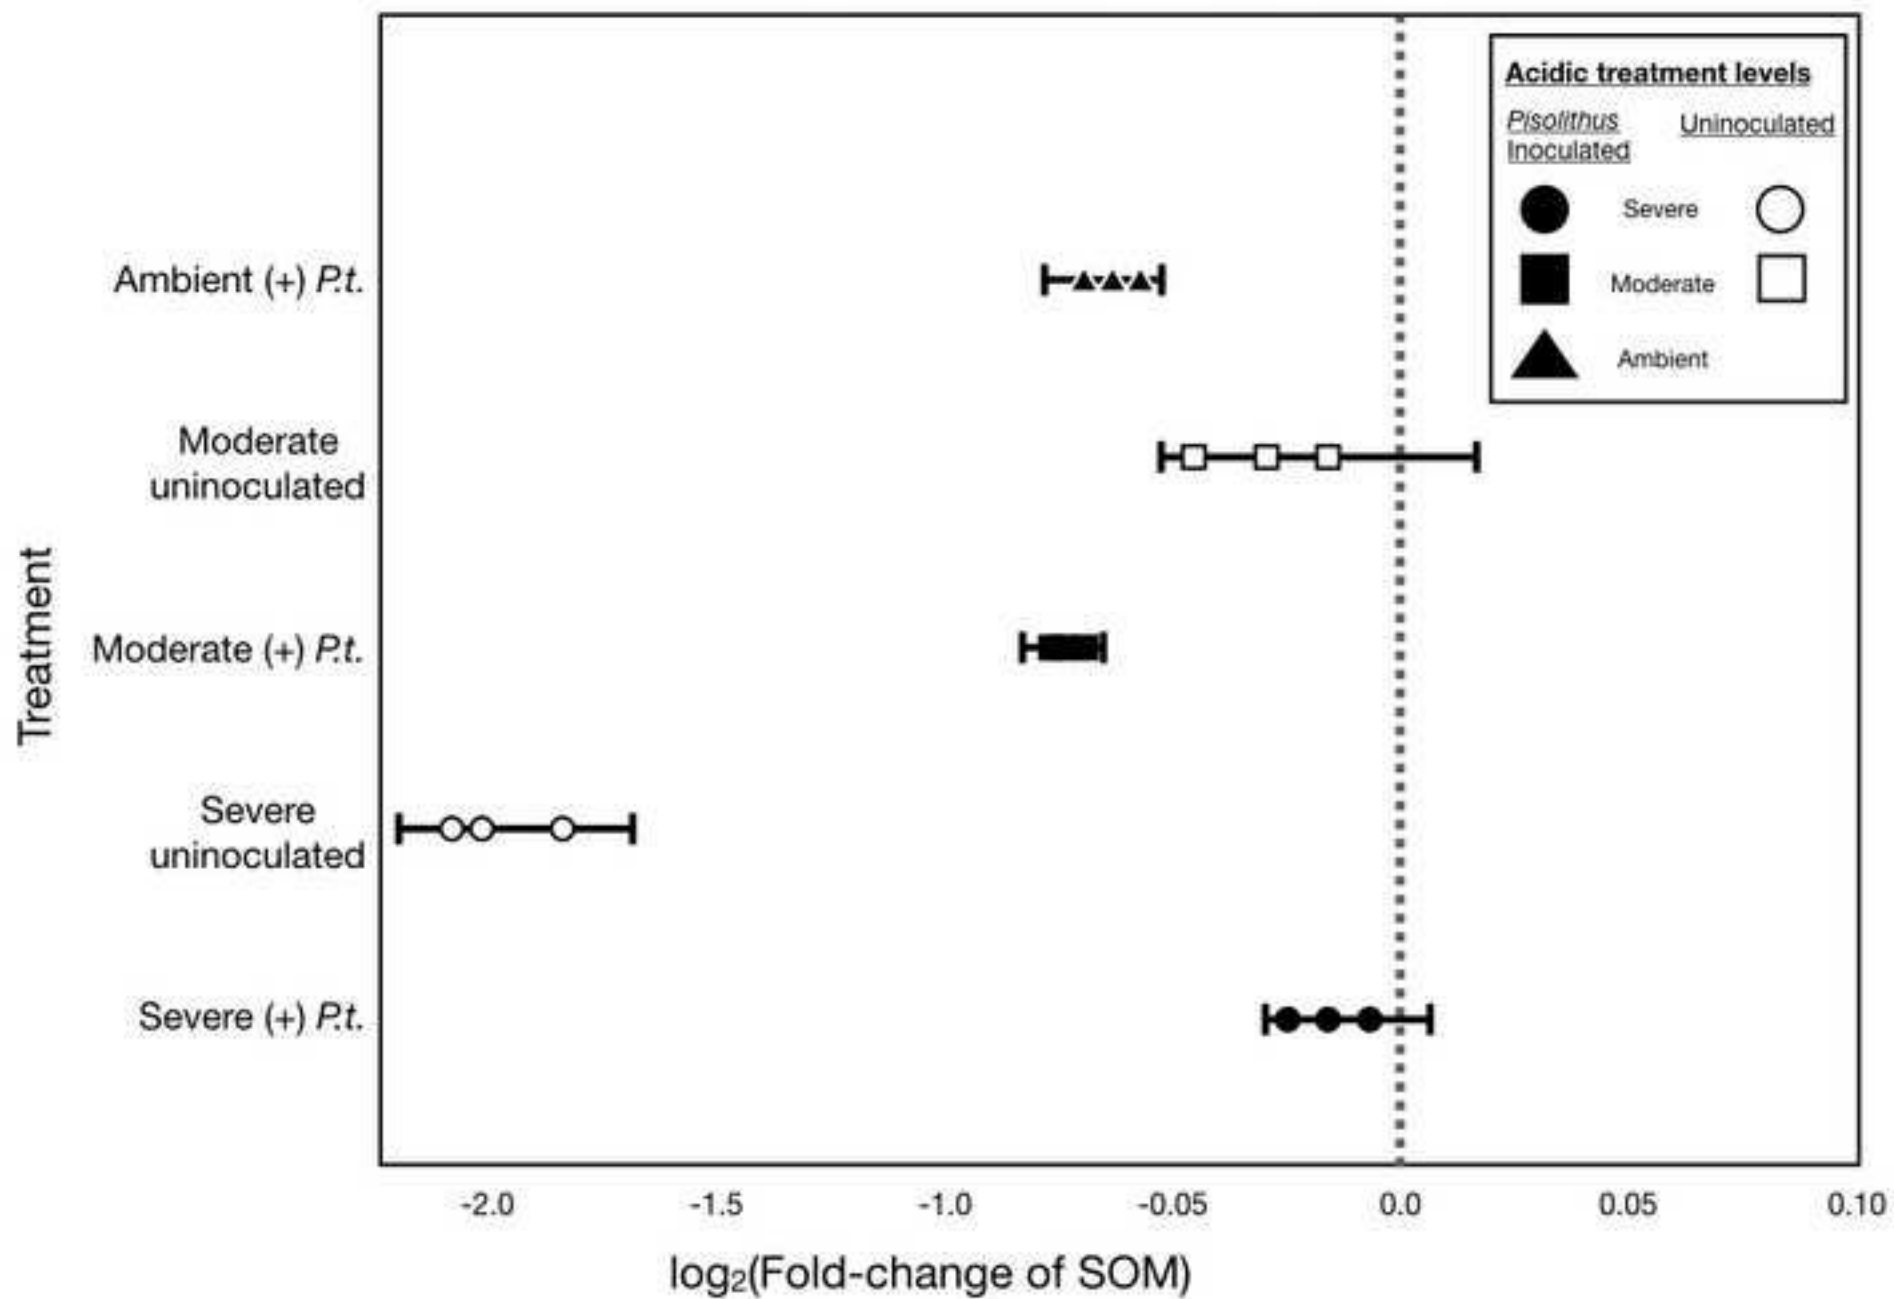

Figure 3. Nitrate response ratios  
[Click here to download high resolution image](#)

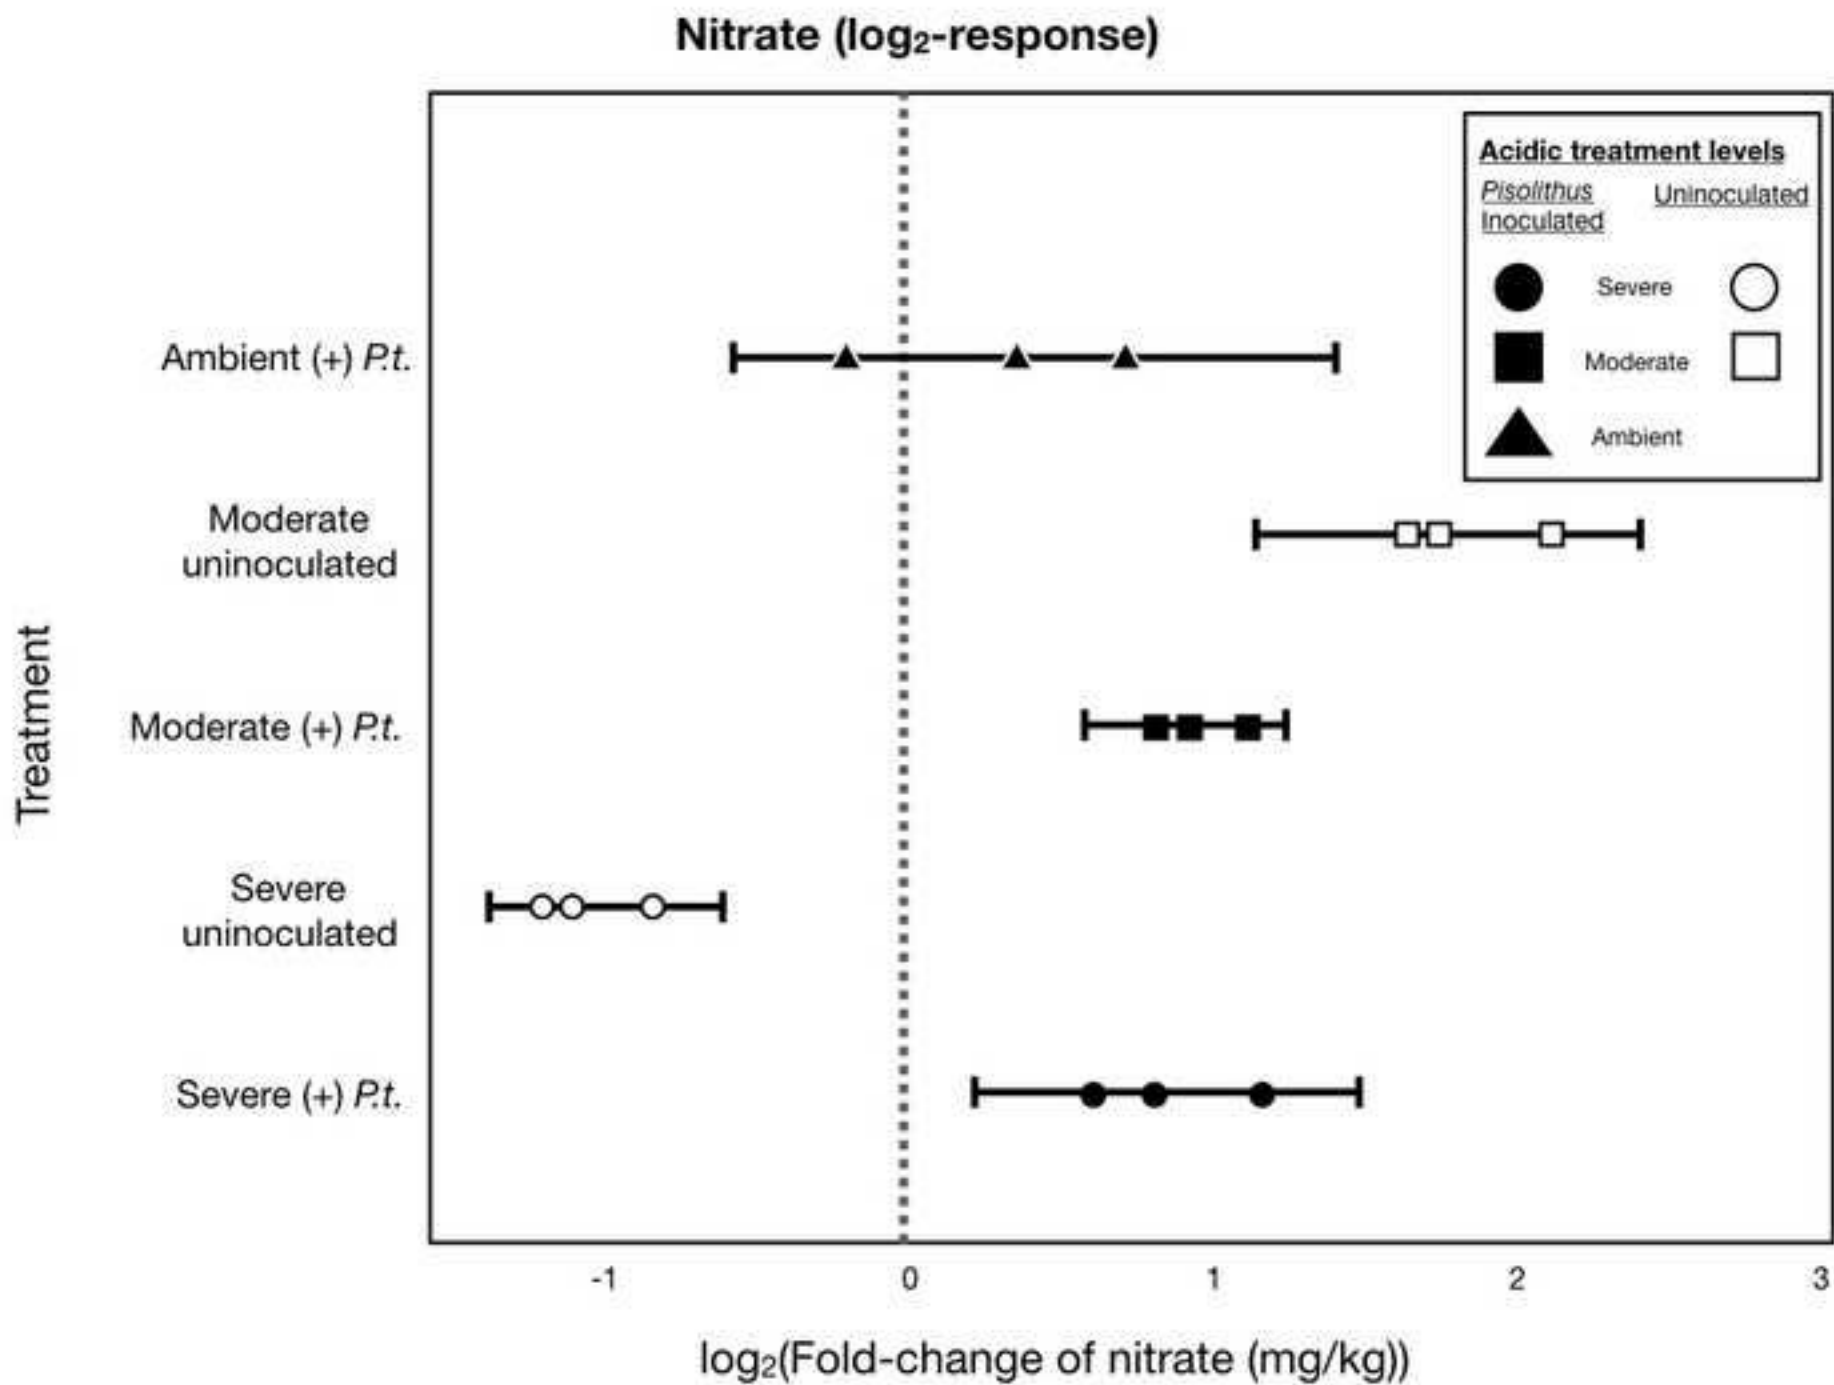

Figure 4. Available P response ratios  
[Click here to download high resolution image](#)

### Available P (log<sub>2</sub>-response)

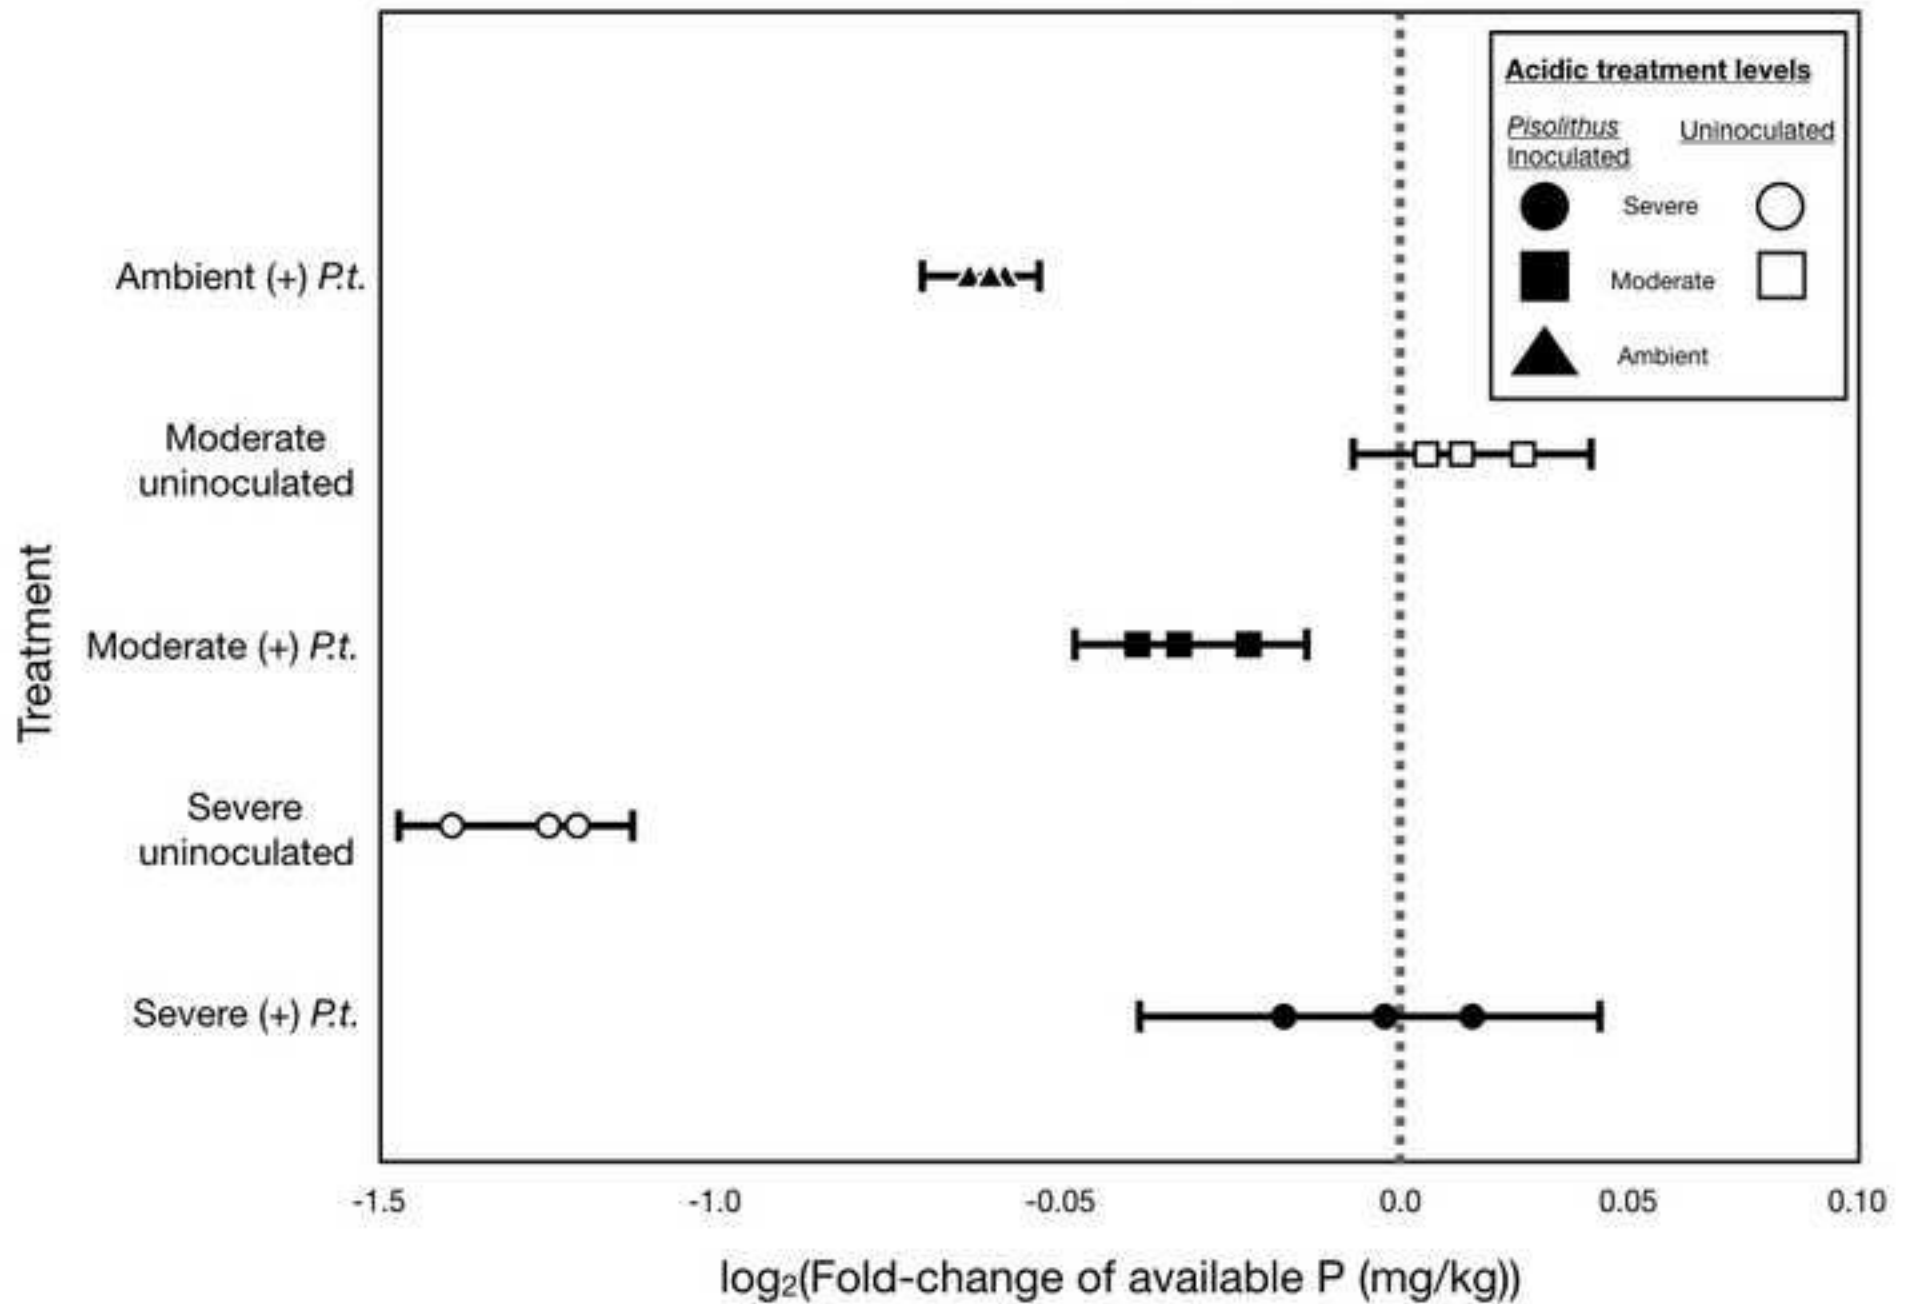

Figure 5. PCoA ITS  
[Click here to download high resolution image](#)

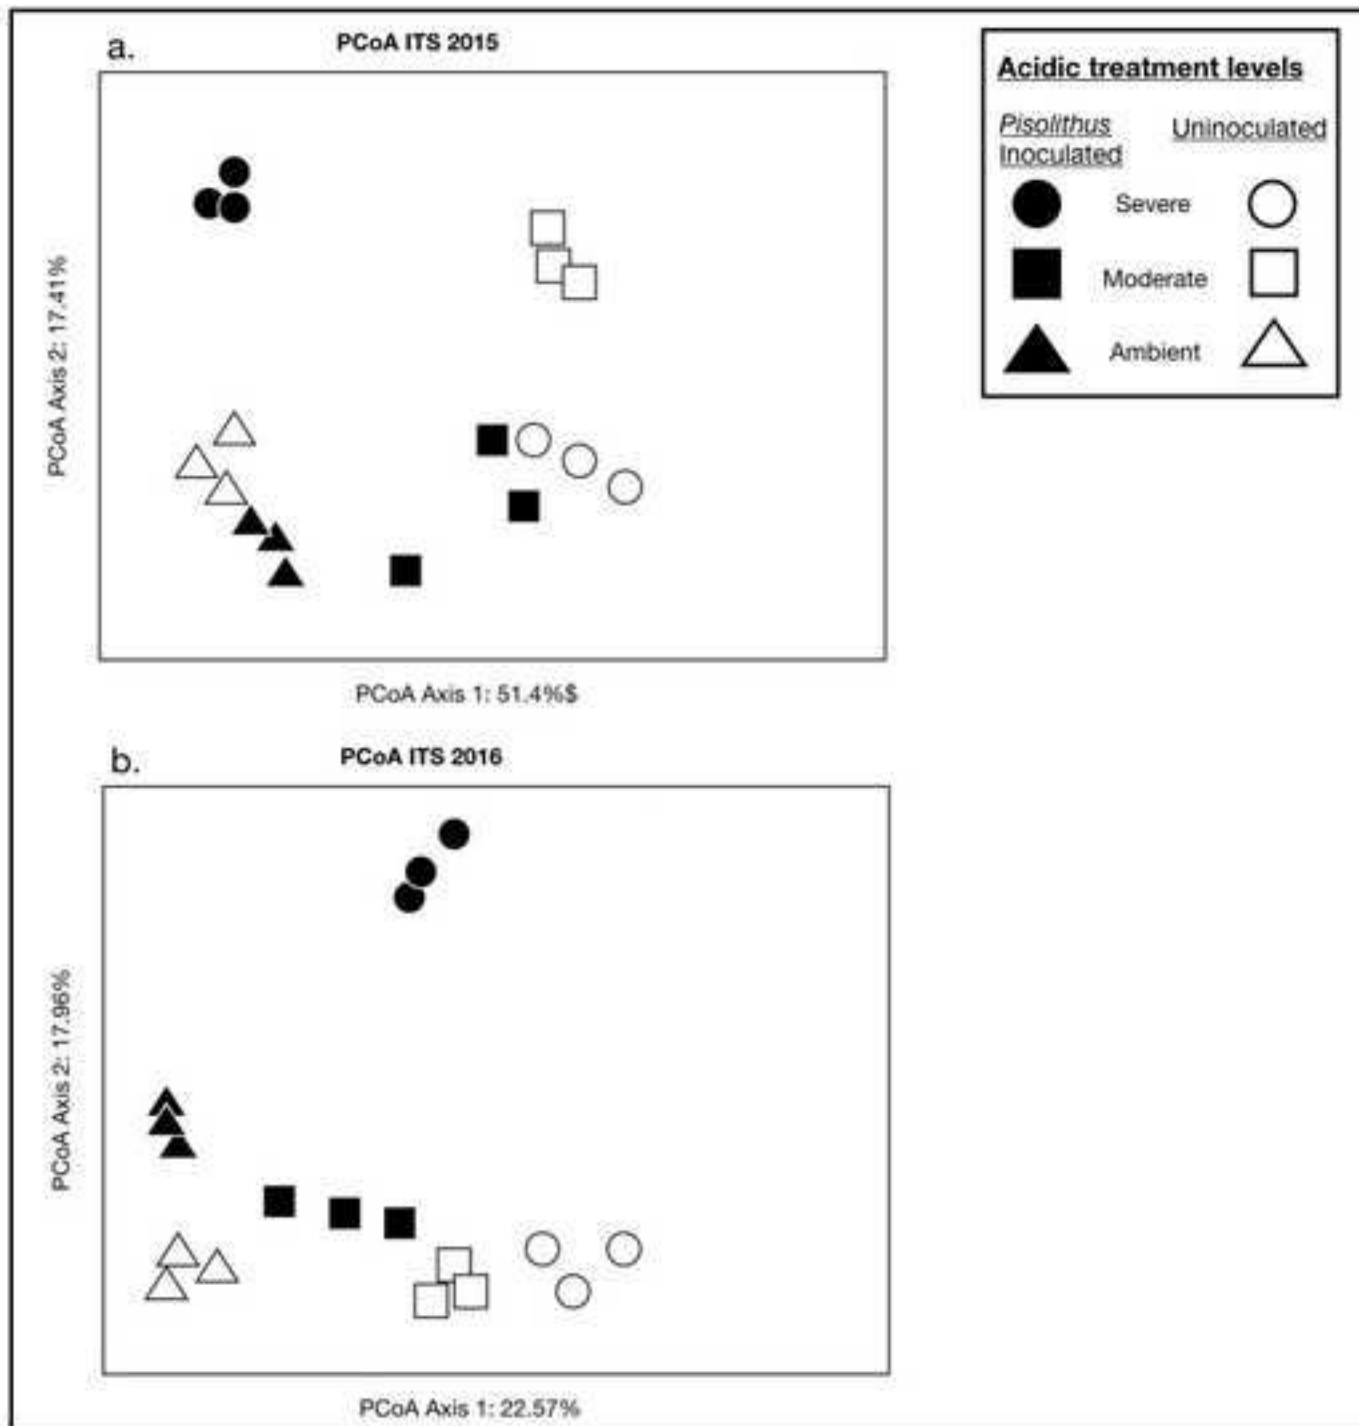

Figure 6. PCoA 16S

[Click here to download high resolution image](#)

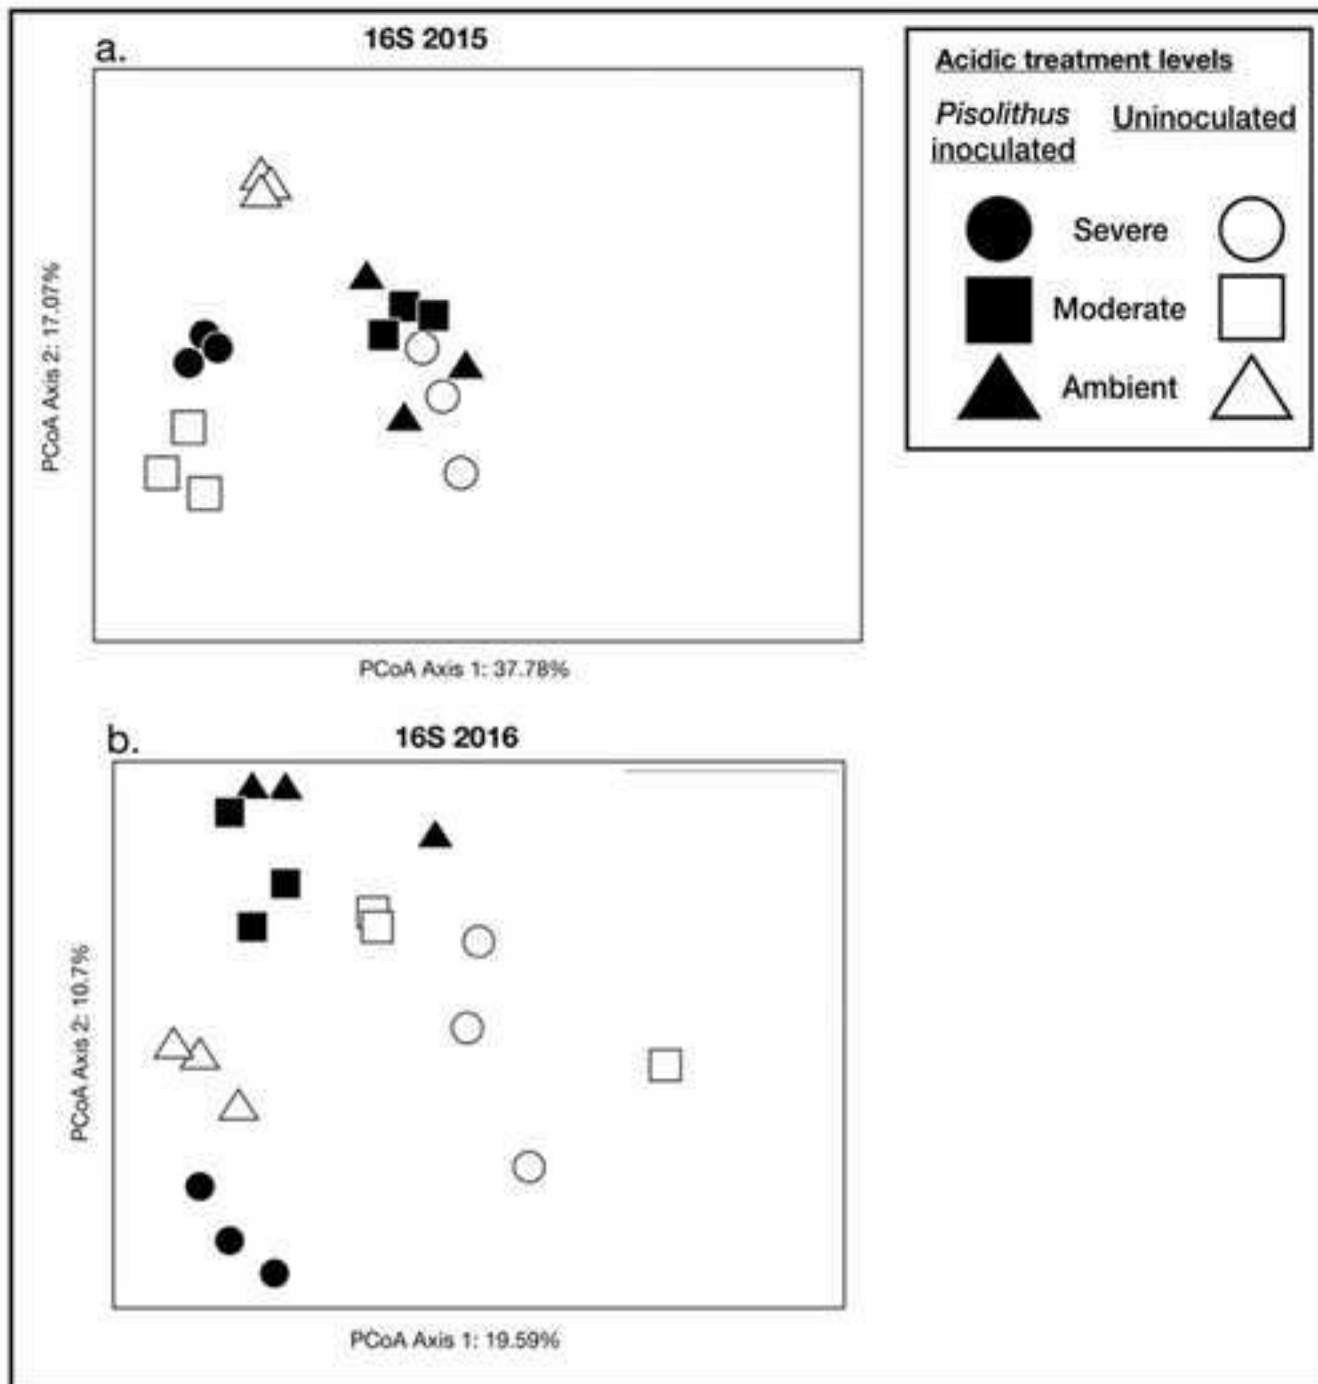

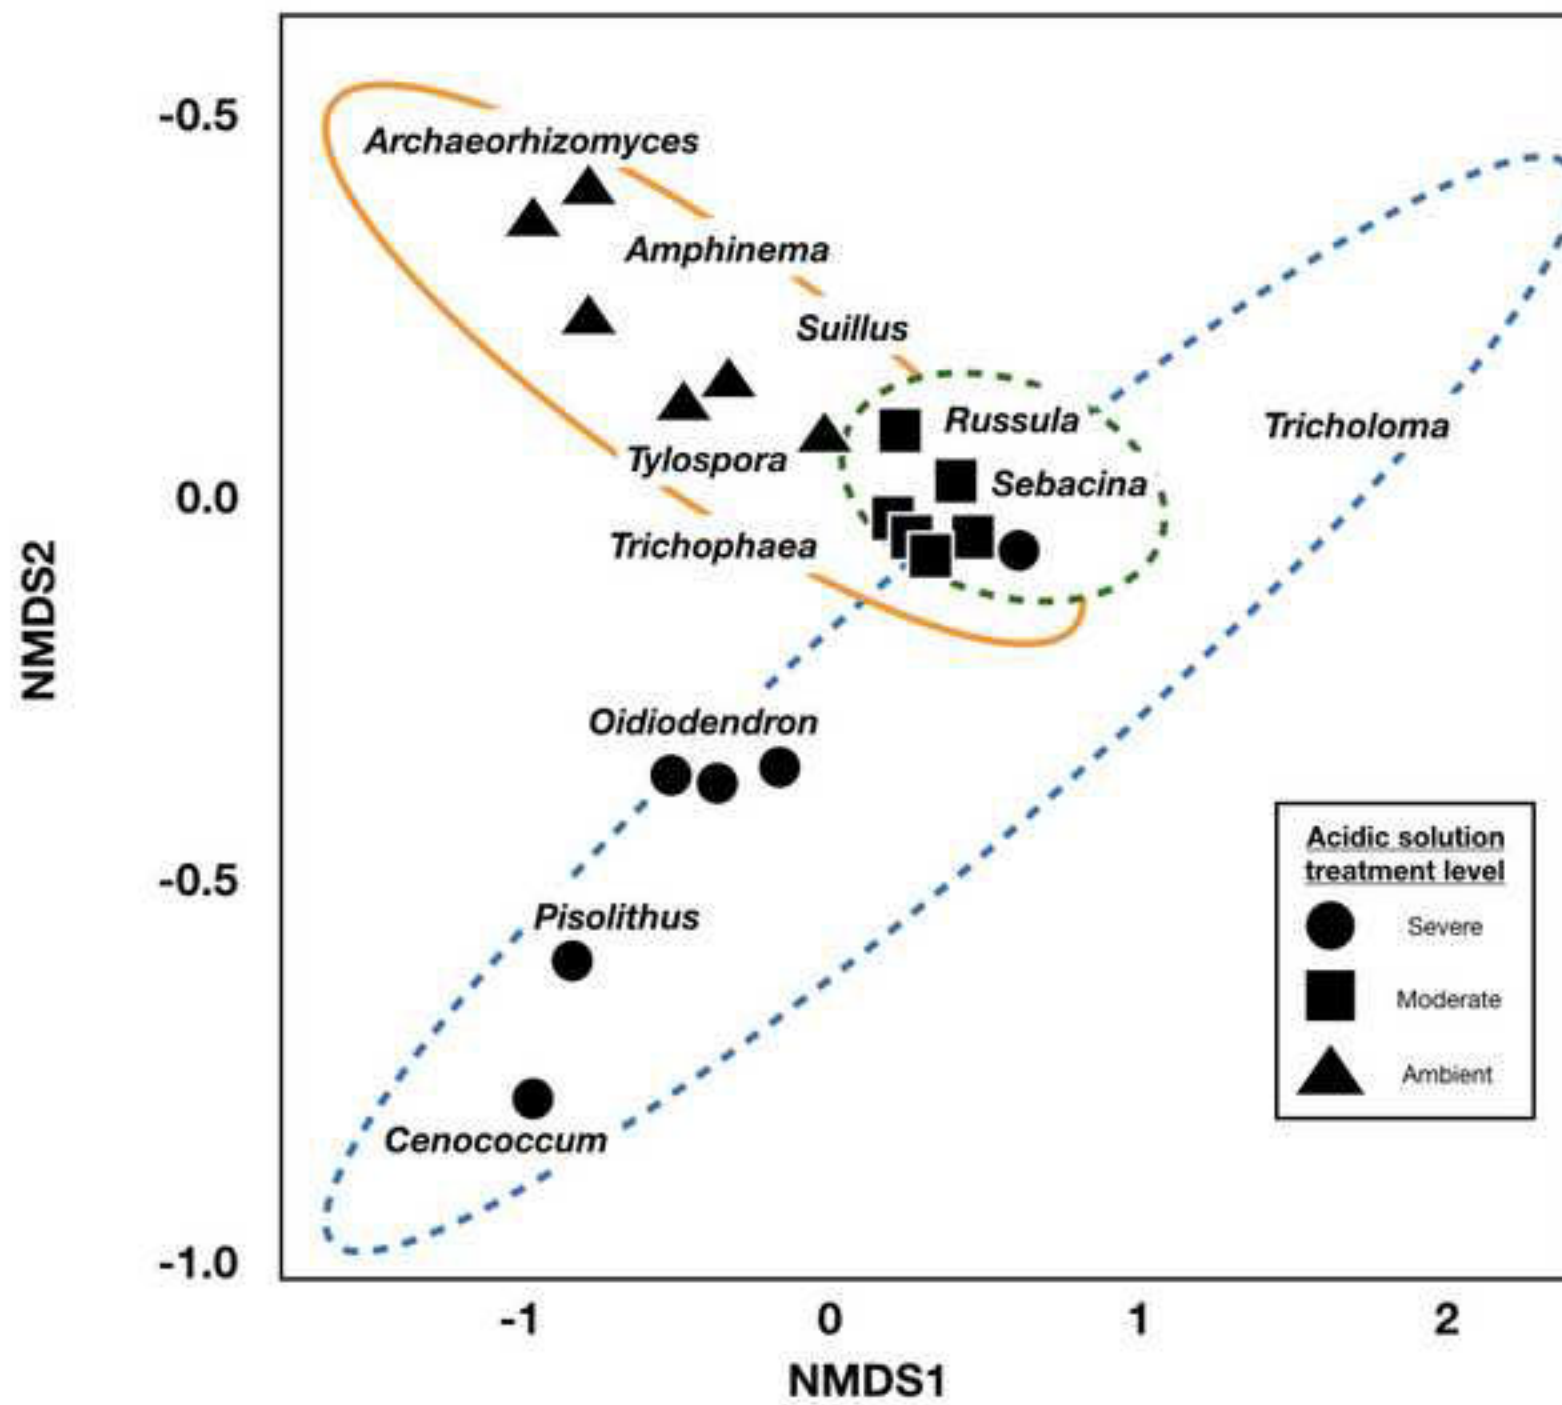

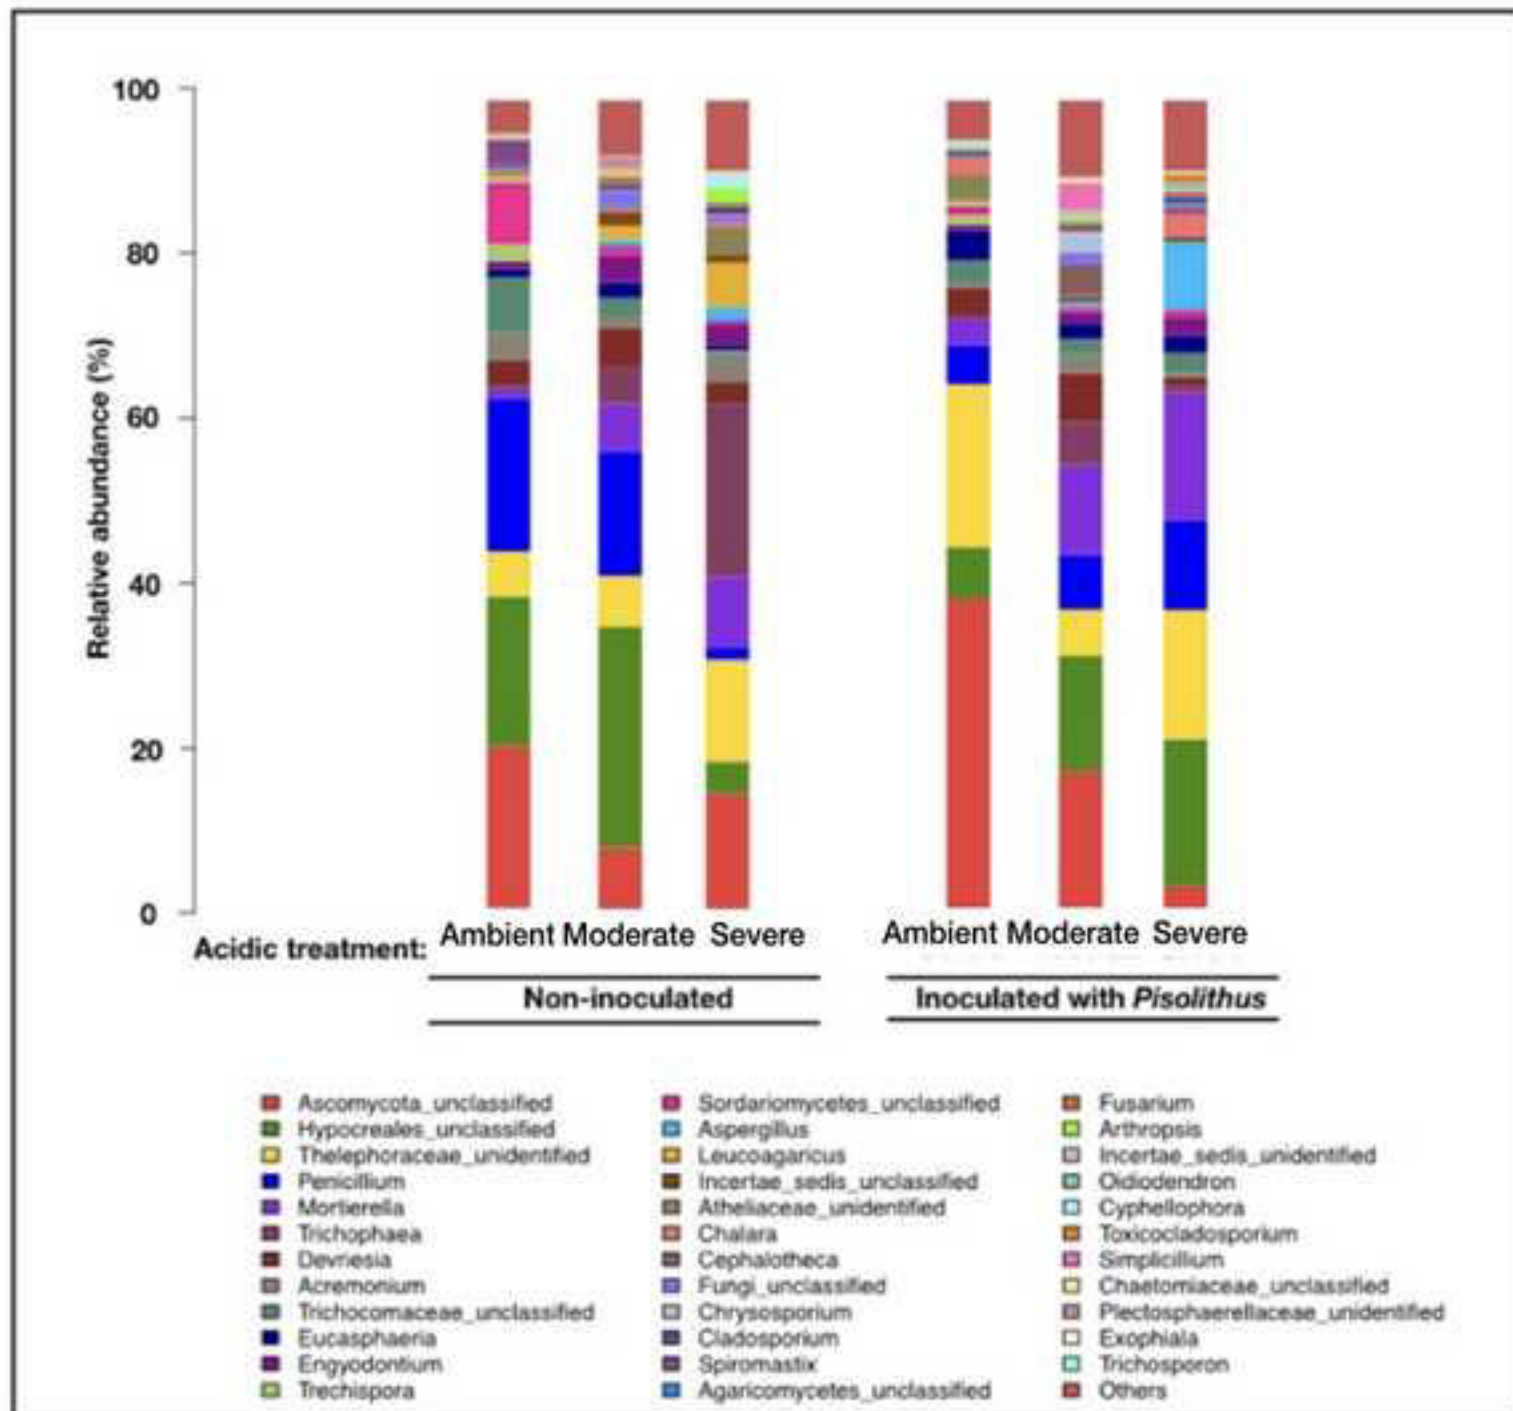



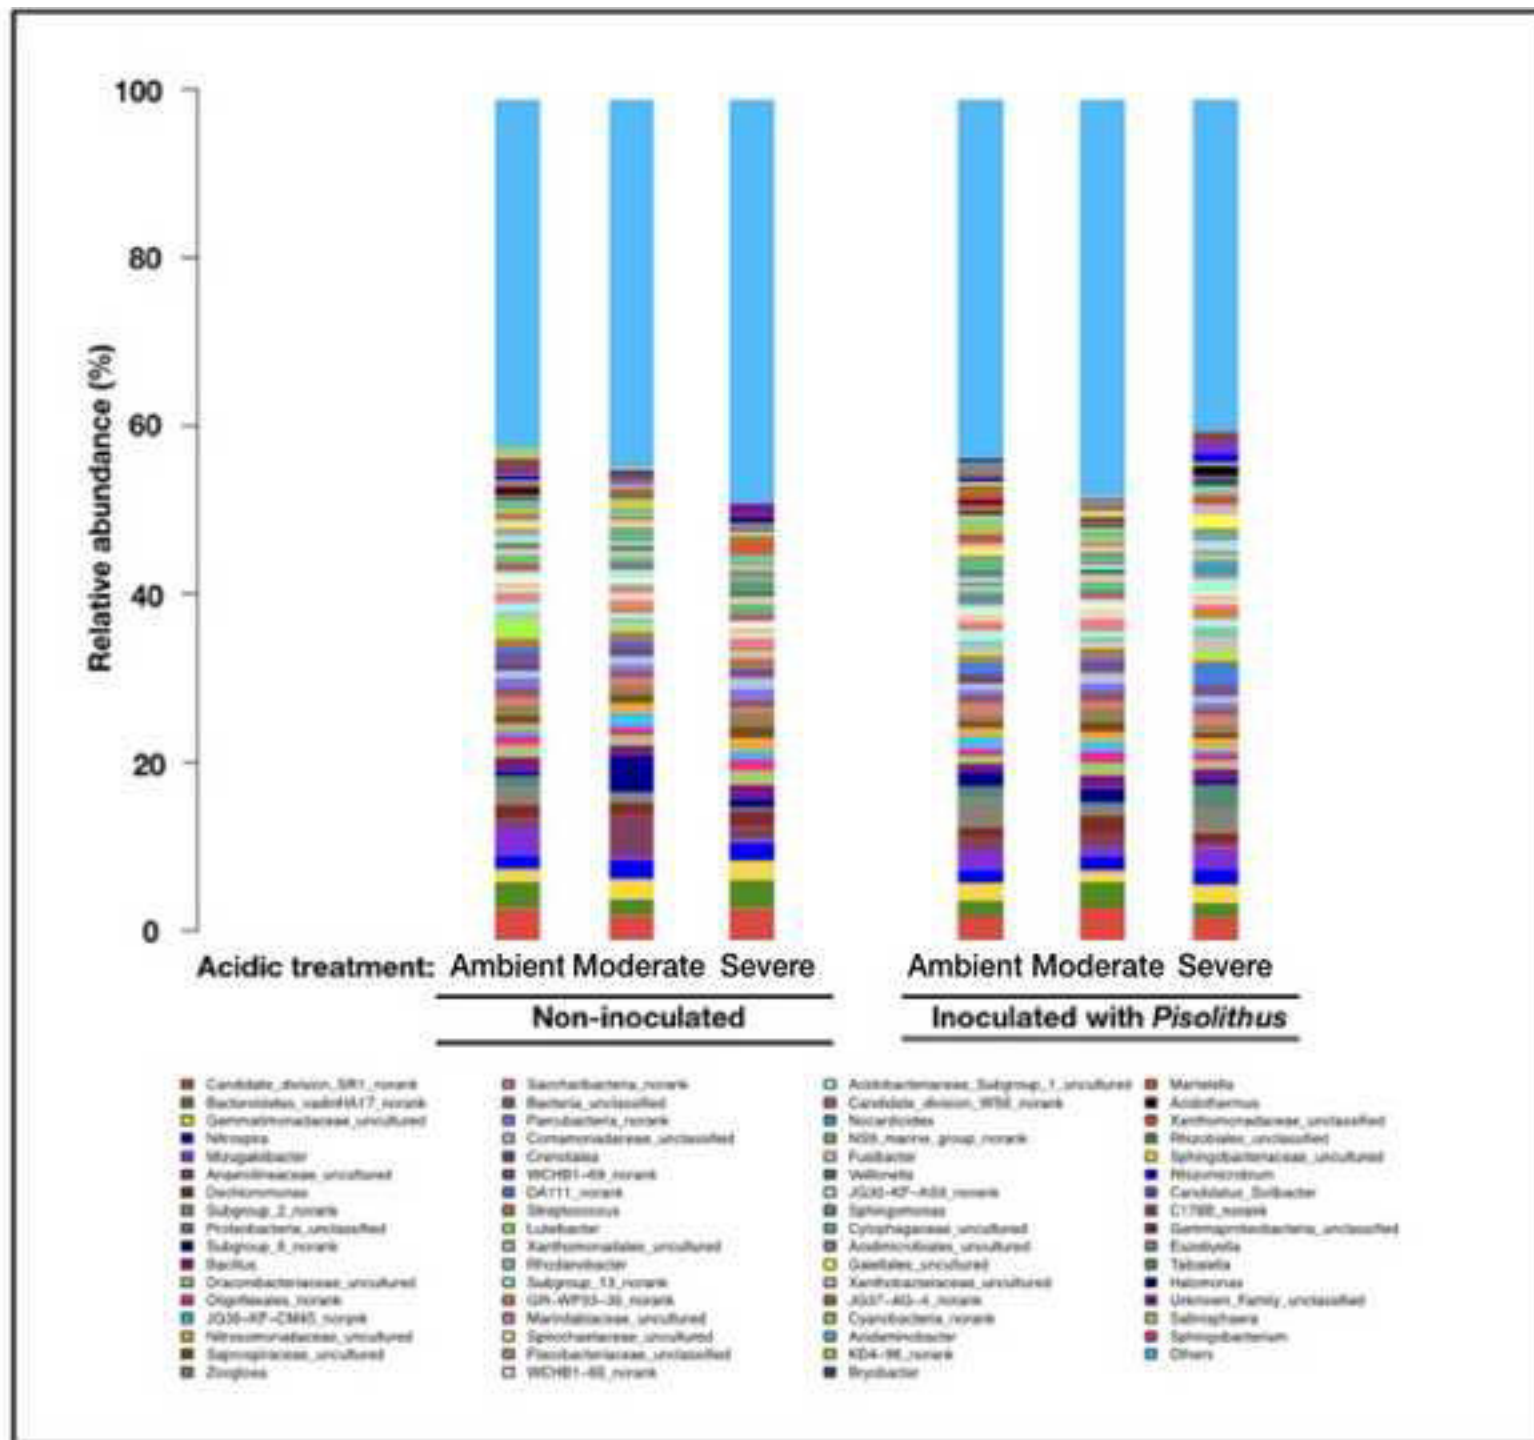

**Table 1** Acidic solution pH and soil pH across time and among treatment combinations demonstrate shifts, both temporally and by either acidic treatments or *Pisolithus* inoculation.

| pH solution<br>+/- <i>P.t.</i> ( <i>Pisolithus</i><br>inoculation) | pH soil<br>2015<br>Pre-treatment | pH soil<br>2015 | pH soil<br>2016 |
|--------------------------------------------------------------------|----------------------------------|-----------------|-----------------|
| Severe<br>3.5 + <i>P.t.</i>                                        | 5.03 ± 0.08                      | 5.46 ± 0.14     | 5.57 ± 0.09     |
| Severe<br>3.5 –                                                    | 5.92 ± 0.08                      | 5.90 ± 0.13     | 6.80 ± 0.09     |
| Moderate<br>4.5 + <i>P.t.</i>                                      | 5.39 ± 0.04                      | 5.71 ± 0.09     | 6.64 ± 0.003    |
| Moderate<br>4.5 –                                                  | 6.17 ± 0.12                      | 6.03 ± 0.06     | 6.65 ± 0.04     |
| Ambient<br>5.6 + <i>P.t.</i>                                       | 6.47 ± 0.38                      | 6.0 ± 0.14      | 6.69 ± 0.04     |
| Ambient<br>5.6 –                                                   | 5.41 ± 0.17                      | 5.43 ± 0.39     | 5.84 ± 0.13     |

**Table 2.** *Pinus massoniana* properties shift with acidic treatments and *Pisolithus tinctorius* inoculation. Values with different letters in the same column indicate significant differences among values in different treatment groups.

| <b>pH solution<br/>+/- <i>P.t.</i><br/>(<i>Pisolithus</i><br/>inoculation)</b> | <b>Plant<br/>diameter<br/>(cm)</b> | <b>Plant height<br/>(cm)</b> | <b>Plant<br/>root:shoot</b> | <b>Dried stem<br/>biomass (g)</b> | <b>Dried needle<br/>biomass (g)</b> |
|--------------------------------------------------------------------------------|------------------------------------|------------------------------|-----------------------------|-----------------------------------|-------------------------------------|
| Severe<br>3.5 + <i>P.t.</i>                                                    | 15.37 ± 0.56<br>(b,c)              | 116.67 ± 1.67<br>(e)         | 14.31 ± 2.20<br>(f)         | 66.98 ± 5.42<br>(b,c)             | 73.29 ± 5.63<br>(b)                 |
| Severe<br>3.5 -                                                                | 13.75 ± 0.58<br>(c)                | 117.33 ± 3.93<br>(e)         | 12.62 ± 0.32<br>(f,g)       | 60.35 ± 7.94<br>(c)               | 71.88 ± 13.86<br>(b)                |
| Moderate<br>4.5 + <i>P.t.</i>                                                  | 18.40 ± 0.56<br>(a)                | 149.33 ± 3.84<br>(d)         | 13.06 ± 1.24<br>(f,g)       | 135.07 ± 8.74<br>(a)              | 142.55 ± 13.08<br>(a)               |
| Moderate<br>4.5 -                                                              | 15.99 ± 1.43<br>(b,c)              | 142.00 ± 4.16<br>(d)         | 12.52 ± 0.21<br>(f,g)       | 80.98 ± 14.56<br>(b,c)            | 154.25 ± 5.20<br>(a)                |
| Ambient<br>+ <i>P.t.</i>                                                       | 15.97 ± 0.36<br>(b,c)              | 156.33 ±<br>10.93 (d)        | 11.23 ± 0.61<br>(f,g)       | 123.77 ± 9.59<br>(a)              | 136.58 ± 4.16<br>(a)                |
| Ambient -                                                                      | 17.60 ± 0.37<br>(a,b)              | 147.67 ± 6.74<br>(d)         | 10.58 ± 0.35<br>(g)         | 90.21 ± 6.67<br>(b)               | 129.77 ± 6.87<br>(a)                |

## Supplementary Information

**Supplemental SI-Table 1. Spatial arrangement of soil pH through time and by proximity to river.** Spatial arrangement ascending in numbers with increasing distance from the Jingouba River

| <b>Spatial block</b><br>Proximity to River | <b>pH soil</b><br>2015<br>Pre-treatment | <b>pH soil</b><br>2015 | <b>pH soil</b><br>2016 |
|--------------------------------------------|-----------------------------------------|------------------------|------------------------|
| <b>one</b>                                 | 5.52 ± 0.37                             | 5.69 ± 0.18            | 5.96 ± 0.34            |
| <b>two</b>                                 | 5.65 ± 0.26                             | 5.65 ± 0.18            | 6.31 ± 0.28            |
| <b>three</b>                               | 5.99 ± 0.48                             | 5.72 ± 0.17            | 6.58 ± 0.20            |
| <b>four</b>                                | 5.85 ± 0.23                             | 5.99 ± 0.13            | 6.71 ± 0.08            |

**Supplemental SI Table 2:** Soil nutrients in our plots treated with acidic treatments and inoculated with *Pisolithus* in both 2015 and 2016.

| pH<br>solution<br>+/- <i>P.t.</i><br>( <i>Pisolithus</i><br>inoculation) | Available P<br>(mg kg <sup>-1</sup> ) |                 | Available<br>K<br>(mg kg <sup>-1</sup> ) |                  | NH <sub>4</sub> -N<br>(mg kg <sup>-1</sup> ) |                 | NO <sub>3</sub> -N<br>(mg kg <sup>-1</sup> ) |                   | Soil organic matter<br>(mg kg <sup>-1</sup> ) |                 |
|--------------------------------------------------------------------------|---------------------------------------|-----------------|------------------------------------------|------------------|----------------------------------------------|-----------------|----------------------------------------------|-------------------|-----------------------------------------------|-----------------|
|                                                                          | 2015                                  | 2016            | 2015                                     | 2016             | 2015                                         | 2016            | 2015                                         | 2016              | 2015                                          | 2016            |
| Severe<br>3.5<br>+ <i>P.t.</i>                                           | 9.0 ±<br>0.31                         | 14.09 ±<br>0.76 | 193.33 ±<br>6.36                         | 211.0 ±<br>7.09  | 7.92 ±<br>0.58                               | 9.22 ±<br>2.01  | 239.78 ±<br>5.2                              | 344.47 ±<br>39.87 | 17.75 ±<br>0.20                               | 19.27 ±<br>0.29 |
| Severe<br>3.5 -                                                          | 6.0 ± 0.2                             | 6.02 ±<br>0.18  | 160.33 ±<br>13.57                        | 127.67 ±<br>2.91 | 1.97 ±<br>0.15                               | 1.50 ±<br>1.50  | 118.54 ±<br>0.88                             | 88.54 ±<br>6.31   | 11.82 ±<br>0.17                               | 5.44 ±<br>0.25  |
| Moderate<br>4.5<br>+ <i>P.t.</i>                                         | 9.83 ±<br>1.54                        | 11.73 ±<br>0.76 | 163.67 ±<br>5.23                         | 175.00 ±<br>4.04 | 3.73 ±<br>0.11                               | 8.41 ±<br>2.40  | 153.78 ±<br>5.53                             | 367.89 ±<br>23.16 | 13.22 ±<br>0.59                               | 13.0 ±<br>0.01  |
| Moderate<br>4.5 -                                                        | 11.83 ±<br>1.17                       | 15.57 ±<br>0.42 | 205.33 ±<br>12.17                        | 259.33 ±<br>1.67 | 3.96 ±<br>0.39                               | 7.38 ±<br>1.82  | 275.32 ±<br>4.08                             | 708.19 ±<br>85.50 | 19.94 ±<br>0.65                               | 17.60 ±<br>0.96 |
| Ambient<br>+ <i>P.t.</i>                                                 | 7.03 ±<br>0.28                        | 9.51 ±<br>0.12  | 169.33 ±<br>0.67                         | 200.0 ±<br>4.62  | 1.83 ±<br>0.22                               | 4.06 ±<br>1.24  | 56.26 ±<br>3.35                              | 227.35 ±<br>44.40 | 13.06 ±<br>0.27                               | 13.79 ±<br>0.19 |
| Ambient<br>-                                                             | 14.45 ±<br>0.47                       | 13.28 ±<br>0.18 | 207.67 ±<br>2.63                         | 244.67 ±<br>1.33 | 3.58 ±<br>0.32                               | 12.80 ±<br>1.35 | 180.32 ±<br>26.02                            | 879.68 ±<br>34.12 | 20.05 ±<br>0.20                               | 17.81 ±<br>0.83 |

**Supplementary Table.** Soil properties from 2015 in our plots treated with acidic treatments and inoculated with *Pisolithus*. Elemental analyses included sodium (Na), calcium (Ca), magnesium (Mg), and aluminum (Al), as well as cation exchange capacity (CEC).

| pH solution<br>+/- <i>P.t.</i><br>( <i>Pisolithus</i><br>inoculation) | Na<br>(cmol kg <sup>-1</sup> ) | Ca<br>(cmol kg <sup>-1</sup> ) | Mg<br>(cmol kg <sup>-1</sup> ) | Al<br>(mg kg <sup>-1</sup> ) | CEC<br>(cmol kg <sup>-1</sup> ) |
|-----------------------------------------------------------------------|--------------------------------|--------------------------------|--------------------------------|------------------------------|---------------------------------|
| Severe<br>3.5 + <i>P.t.</i>                                           | 1.0 ± 0.06                     | 6.45 ± 0.14                    | 0.42 ± 0.02                    | 7.02 ± 2.19                  | 7.08 ± 0.98                     |
| Severe<br>3.5 -                                                       | 0.75 ± 0.04                    | 5.57 ± 0.16                    | 0.95 ± 0.05                    | 2.12 ± 0.27                  | 7.69 ± 0.08                     |
| Moderate<br>4.5 + <i>P.t.</i>                                         | 0.67 ± 0.02                    | 4.42 ± 0.07                    | 1.25 ± 0.36                    | 3.23 ± 0.29                  | 8.54 ± 0.43                     |
| Moderate<br>4.5 -                                                     | 0.85 ± 0.11                    | 8.22 ± 0.97                    | 0.44 ± 0.01                    | 1.66 ± 0.09                  | 8.49 ± 0.41                     |
| Ambient<br>+ <i>P.t.</i>                                              | 0.73 ± 0.03                    | 4.95 ± 0.09                    | 0.57 ± 0.01                    | 2.52 ± 0.99                  | 8.3 ± 1.35                      |
| Ambient -                                                             | 0.61 ± 0.01                    | 5.12 ± 0.70                    | 0.39 ± 0.01                    | 6.34 ± 1.3                   | 7.76 ± 0.77                     |

**Supplemental SI-Table 4.** Bacterial community diversity metrics from 2016. Metrics include: Abundance-based Coverage Estimate (ACE), Chao1, Fisher, Observed OTUs, Shannon, and Simpsons.

| <b>pH<br/>solution<br/>+/- <i>P.t.</i><br/>(<i>Pisolithus</i><br/>inoculation)</b> | <b>ACE</b>         | <b>Chao1</b>       | <b>Fisher</b>    | <b>Observed<br/>OTUs</b> | <b>Shannon</b> | <b>Simpson</b>   |
|------------------------------------------------------------------------------------|--------------------|--------------------|------------------|--------------------------|----------------|------------------|
| 3.5 + <i>P.t.</i>                                                                  | 2642.04 ±<br>24.75 | 2639.84 ±<br>50.80 | 601.62±<br>12.03 | 2178.67±<br>31.84        | 6.57±<br>0.019 | 0.995±<br>0.0003 |
| 3.5 –                                                                              | 2587.61 ±<br>24.06 | 2625.95 ±<br>51.97 | 594.80±<br>26.17 | 2159.67±<br>70.11        | 6.53±<br>0.069 | 0.997±<br>0.0004 |
| 4.5 + <i>P.t.</i>                                                                  | 2868.45 ±<br>25.69 | 2883.93 ±<br>54.57 | 672.13±<br>11.16 | 2361.67±<br>28.48        | 6.73±<br>0.028 | 0.997±<br>0.0001 |
| 4.5 –                                                                              | 2793.60 ±<br>25.45 | 2796.59±<br>52.2   | 652.28±<br>37.44 | 2309±<br>97.22           | 6.74±<br>0.113 | 0.997±<br>0.0006 |
| 5.6 + <i>P.t.</i><br>(Ambient)                                                     | 2875.35 ±<br>25.04 | 2887.16 ±<br>57.23 | 662.43±<br>23.08 | 2336.33±<br>63.38        | 6.70±<br>0.046 | 0.997±<br>0.0001 |
| 5.6 –<br>(Ambient)                                                                 | 2696.85 ±<br>25.31 | 2694.06 ±<br>55.28 | 600.43±<br>5.96  | 2175.67±<br>15.76        | 6.48±<br>0.025 | 0.995±<br>0.0004 |

**Supplemental SI-Table 5.** Fungal community diversity metrics from 2016. Metrics include: Abundance-based Coverage Estimate (ACE), Chao1, Fisher, Observed OTUs, Shannon, and Simpsons.

| <b>pH</b><br>solution<br>+/- <i>P.t.</i><br>( <i>Pisolithus</i><br>inoculation) | <b>ACE</b>        | <b>Chao1</b>      | <b>Fisher</b>  | <b>Observed<br/>OTUs</b> | <b>Shannon</b> | <b>Simpson</b> |
|---------------------------------------------------------------------------------|-------------------|-------------------|----------------|--------------------------|----------------|----------------|
| 3.5 + <i>P.t.</i>                                                               | 480.39 ±<br>20.43 | 477.28 ±<br>16.31 | 63.31±<br>3.42 | 389.0±<br>17.06          | 3.03±<br>0.079 | 0.84±<br>0.006 |
| 3.5 –                                                                           | 439.98 ±<br>8.91  | 451.29 ±<br>7.95  | 56.54±<br>0.88 | 353.67±<br>4.48          | 2.97± 0.2      | 0.89±<br>0.013 |
| 4.5 + <i>P.t.</i>                                                               | 538.29 ±<br>29.61 | 541.03 ±<br>37.33 | 75.36±<br>2.06 | 450.0±<br>10.26          | 3.73± 0.04     | 0.94±<br>0.005 |
| 4.5 –                                                                           | 496.21 ±<br>18.22 | 475.001±<br>17.34 | 67.94±<br>2.70 | 412.67±<br>13.67         | 3.35± 0.02     | 0.90±<br>0.011 |
| 5.6 + <i>P.t.</i><br>(Ambient)                                                  | 540.38 ±<br>22.99 | 523.13 ±<br>25.7  | 75.58±<br>2.81 | 451.0±<br>14.47          | 3.58± 0.09     | 0.93± 0.01     |
| 5.6 –<br>(Ambient)                                                              | 429.08 ±<br>17.88 | 428.87 ±<br>14.51 | 65.11±<br>3.35 | 398.0±<br>17.57          | 3.63± 0.12     | 0.92±<br>0.011 |



**Supplemental molecular methods: SI**

We extracted total DNA from each of the three 0.25 g soil aliquots using an E.Z.N.A.® soil DNA Kit (Omega Bio-tek, Norcross, GA, U.S.) according to manufacturer's protocols. We pooled these DNA extracts into a single representative DNA extract and subsequently standardized concentrations to 10 ng/μl before Polymerase chain reactions (PCR) amplification. We targeted hypervariable portions of both the V3–V4 region of the bacterial 16S rRNA gene and the fungal internal transcribed spacer (fungal ITS1) region using primers modified for Illumina Miseq sequencing (Illumina Incorporated, California).

For bacteria, the V3-V4 region of 16S was amplified using forward primer 338F (5'-ACTCCTACGGGAGGCAGCAG-3) and reverse primer 806R (5'-GGACTACHVGGGTWTCTAAT-3'), along with a unique eight-base barcode assigned to each sample. For fungi, the internal transcribed spacer region was amplified with forward primer ITS1 (5' - CTTGGTCATTTAGAGGAAGTAA-3') and reverse primer 2043R (5' - GCTGCGTTCTTCATCGATGC-3'). Fungal ITS1 region was targeted, along with unique molecular barcodes assigned to each reverse primer. For both 16S and ITS1, polymerase chain reactions were set up in triplicate using 0.8 μl of each primer (5 μM), 0.4 μL of FastPfu Polymerase, 10 ng of DNA template, 2 μL of 2.5 mM dNTPs, 4 μL of 5 × FastPfu Buffer. Reactions ran for 95 °C for 3 min, followed by 25 cycles at 95 °C for 30 s, 55 °C for 30 s, and 72 °C for 30 s and a final extension at 72 °C for 10 min.

Both 16S and ITS, PCR amplicons were visualized using gel electrophoresis, and subsequently extracted from 2% agarose gels. Amplicons were purified using a AxyPrep DNA Gel Extraction Kit (Axygen Biosciences, Union City, California) according to the manufacturer's instructions, and then quantified in individual tubes using QuantiFluor™ -ST

(Promega, Madison, Wisconsin). Purified amplicons were pooled in equimolar concentrations for downstream Illumina sequencing.

Our PCR products were sequenced on an Illumina MiSeq flowcell by Shanghai Majorbio (Shanghai, China) and paired-end sequences were generated ( $2 \times 300$ ) according to the standard protocols. Raw fastq files were demultiplexed, quality-filtered using QIIME (version 1.17); 300 basepair (bp) reads were truncated at quality scores  $<20$  over a 50 bp range and truncated reads shorter than 50bp were discarded. Barcode matching allowed for any two nucleotide base mismatches, however, reads containing ambiguous characters were removed. Only sequences overlapping longer than 10 bp were assembled according to their overlap sequence. Operational Units (OTUs) were clustered with 97% similarity cutoff using UPARSE (version 7.1 <http://drive5.com/uparse/>) (Edgar 2013). Chimeric sequences were identified and removed using UCHIME. Taxonomic information associated with each 16S rRNA gene sequence was analyzed by RDP Classifier (<http://rdp.cme.msu.edu/>) against the Silva (SSU115) 16S rRNA database and taxonomy of each ITS1 gene sequence was analyzed by RDP Classifier (<http://rdp.cme.msu.edu/>) against the UNITE 7.0 database.

### **Reference:**

Edgar, R.C. 2013. UPARSE: highly accurate OTU sequences from microbial amplicon reads. *Nat Methods* 10: 996. doi:10.1038/Nmeth.2604.
